## **Stochastic processes dominate the within and between host evolution of influenza virus**

Running Title: Influenza dynamics within and between hosts

John T. McCrone<sup>1</sup>, Robert J. Woods<sup>2</sup>, Emily T. Martin<sup>3</sup>, Ryan E. Malosh<sup>3</sup>, Arnold S. Monto<sup>3</sup>, and Adam S. Lauring<sup>1,2\*</sup>

<sup>1</sup> Department of Microbiology and Immunology, University of Michigan, Ann Arbor, MI 48109

<sup>2</sup> Division of Infectious Diseases, Department of Internal Medicine, University of Michigan, Ann Arbor, MI 48109

<sup>3</sup> Department of Epidemiology, University of Michigan, Ann Arbor, MI 48109

\* Corresponding author

Adam S. Lauring

1150 W. Medical Center Dr.

MSRB1 Room 5510B

Ann Arbor, MI 48109-5680

(734) 764-7731

[alauring@med.umich.edu](mailto:alauring@med.umich.edu)

Abstract Word Count:

Main Text Word Count:

Key Words – influenza virus, bottleneck, transmission, diversity, evolution

## 1 **Abstract**

2 The global evolutionary dynamics of influenza virus ultimately derive from processes that take  
3 place within and between infected individuals. Here we define the dynamics of influenza A virus  
4 populations in human hosts through next generation sequencing of 249 specimens from 200  
5 individuals collected over 6290 person-seasons of observation. Because these viruses were  
6 collected over 5 seasons from individuals in a prospective community-based cohort, they are  
7 broadly representative of natural human infections with seasonal viruses. We used viral  
8 sequence data from 35 serially sampled individuals to estimate a within host effective population  
9 size of 30-70 and an in vivo mutation rate of  $4 \times 10^{-5}$  per nucleotide per cellular infectious cycle.  
10 These estimates are consistent across several models and robust to the models' underlying  
11 assumptions. We also identified 43 epidemiologically linked and genetically validated  
12 transmission pairs. Maximum likelihood optimization of multiple transmission models estimates  
13 an effective transmission bottleneck of 1-2 distinct genomes. Our data suggest that positive  
14 selection of novel viral variants is inefficient at the level of the individual host and that genetic  
15 drift and other stochastic processes dominate the within and between host evolution of influenza  
16 A viruses.

## 17 18 **Introduction**

19 The rapid evolution of influenza viruses has led to reduced vaccine efficacy, widespread drug  
20 resistance, and the continuing emergence of novel strains. Broadly speaking, evolution is the  
21 product of deterministic processes, such as selection, and stochastic processes, such as  
22 genetic drift (Kouyos et al. 2006). The relative contribution of each is greatly affected by the  
23 effective population size, or size of an idealized population whose dynamics are similar to that of  
24 the population in question (Rouzine et al. 2001). If the effective population size of a virus is large,  
25 as in quasispecies models, evolution is largely deterministic and the frequency of a mutation  
26 can be predicted based on its starting frequency and selection coefficient. In small populations,

27 selection is inefficient, and changes in mutation frequency are strongly influenced by migration  
28 or genetic drift.

29  
30 Viral dynamics may differ across spatial and temporal scales, and a complete understanding of  
31 influenza evolution requires studies at all levels (Nelson & Holmes 2007; Holmes 2009). The  
32 global evolution of influenza A virus (IAV) is dominated by the positive selection of novel  
33 antigenic variants that circulate in the tropics and subsequently seed annual epidemics in the  
34 Northern and Southern hemisphere (Rambaut et al. 2008). Whole genome sequencing has also  
35 demonstrated the importance of intrasubtype reassortment to the emergence of diverse strains  
36 that differ in their antigenicity. While continual positive selection of antigenically drifted variants  
37 drives global patterns, whole genome sequencing of viruses on more local scales suggests the  
38 importance of stochastic processes such as strain migration and within-clade reassortment  
39 (Nelson et al. 2006).

40  
41 It is now feasible to efficiently sequence patient-derived isolates at sufficient depth of coverage  
42 to define the diversity and dynamics of virus evolution within individual hosts (Kao et al. 2014).  
43 Studies of IAV populations in animal and human systems suggest that most intrahost single  
44 nucleotide variants (iSNV) are rare and that intrahost populations are subject to strong purifying  
45 selection (Rogers et al. 2015; Murcia et al. 2010; Iqbal et al. 2009; Poon et al. 2016; Dinis et al.  
46 2016; Debbink et al. 2017). While positive selection of adaptive variants is commonly observed  
47 in cell culture (Doud et al. 2017; ARCHETTI & HORSFALL 1950; Foll et al. 2014), it has only  
48 been documented within human hosts in the extreme cases of drug resistance (Gubareva et al.  
49 2001; Ghedin et al. 2011; Rogers et al. 2015), long-term infection of immunocompromised hosts  
50 (Xue et al. 2017) or experimental infections with attenuated viruses (Sobel Leonard et al. 2016).  
51 Indeed, we and others have been unable to identify evidence for positive selection in natural

52 human infections (Debbink et al. 2017; Dinis et al. 2016), and its relevance to within host  
53 processes is unclear.

54

55 Despite limited evidence for positive selection, it is clear that novel mutations do arise within  
56 hosts. Their potential for subsequent spread through host populations is determined by the size  
57 of the transmission bottleneck (Alizon et al. 2011; Zwart & Elena 2015). If the transmission  
58 bottleneck is sufficiently wide, low frequency variants can plausibly be transmitted and spread  
59 through host populations (Geoghegan et al. 2016). Because the transmission bottleneck is  
60 conceptually similar to the effective population size between hosts, its size will also inform the  
61 relative importance of selection and genetic drift in determining which variants are transmitted.  
62 While experimental infections of ferrets suggest a very narrow transmission bottleneck (Varble  
63 et al. 2014; Wilker et al. 2013), studies of equine influenza support a bottleneck wide enough to  
64 allow transmission of rare iSNV (Hughes et al. 2012; Murcia et al. 2010). The only available  
65 genetic study of influenza virus transmission in humans estimated a remarkably large  
66 transmission bottleneck, allowing for transmission of 100-200 genomes (Poon et al. 2016; Sobel  
67 Leonard et al. 2017).

68

69 Here, we use next generation sequencing of within host influenza virus populations to define the  
70 evolutionary dynamics of influenza A viruses (IAV) within and between human hosts. We apply  
71 a benchmarked analysis pipeline to identify iSNV and to characterize the genetic diversity of  
72 H3N2 and H1N1 populations collected over five post-pandemic seasons from individuals  
73 enrolled in a prospective household study of influenza. We use these data to estimate the *in*  
74 *vivo* mutation rate and the within and between host effective population size. We find that  
75 intrahost populations are characterized by purifying selection, a small effective population size,  
76 and limited positive selection. Contrary to what has been previously reported for human  
77 influenza transmission (Poon et al. 2016), but consistent with what has been observed in other



78 viruses (Zwart & Elena 2015), we identify a very tight effective transmission bottleneck that  
79 limits the transmission of rare variants.

80

## 81 **Results**

82 We used next generation sequencing to characterize influenza virus populations collected from  
83 individuals enrolled in the Household Influenza Vaccine Effectiveness (HIVE) study (Monto et al.  
84 2014; Ohmit et al. 2013; Ohmit et al. 2015; Ohmit et al. 2016; Petrie et al. 2013), a community-  
85 based cohort that enrolls 213-340 households of 3 or more individuals in Southeastern Michigan  
86 each year (Table 1). These households are followed prospectively from October to April, with  
87 symptom-triggered collection of nasal and throat swab specimens for identification of respiratory  
88 viruses by RT-PCR (see Methods). In contrast to case-ascertained studies, which identify  
89 households based on an index case who seeks medical care, the HIVE study identifies  
90 symptomatic individuals regardless of illness severity. In the first four seasons of the study  
91 (2010-2011 through 2013-2014), respiratory specimens were collected 0-7 days after illness  
92 onset. Beginning in the 2014-2015 season, each individual provided two samples, a self-  
93 collected specimen at the time of symptom onset and a clinic-collected specimen obtained 0-7  
94 days later. Each year, 59-69% of individuals had self-reported or confirmed receipt of that  
95 season's vaccine prior to local circulation of influenza virus.

96

97 Over five seasons and nearly 6,290 person-seasons of observation, we identified 77 cases of  
98 influenza A/H1N1pdm09 infection and 313 cases of influenza A/H3N2 infection (Table 1).  
99 Approximately half of the cases (n=166) were identified in the 2014-2015 season, in which there  
100 was an antigenic mismatch between the vaccine and circulating strains (Flannery et al. 2016).  
101 All other seasons were antigenically matched. Individuals within a household were considered  
102 an epidemiologically linked transmission pair if they were both positive for the same subtype of

103 influenza virus within 7 days of each other. Several households had 3 or 4 symptomatic cases  
104 within this one-week window, suggestive of longer chains of transmission (Table 1).

105

106 *Within host populations have low genetic diversity*

107 We processed all specimens for viral load quantification and next generation sequencing. Viral  
108 load measurements (genome copies per  $\mu\text{l}$ ) were used for quality control in variant calling,  
109 which we have shown is highly sensitive to input titer (McCrone & Lauring 2016) (Figure 1A).  
110 Accordingly, we report data on 249 high quality specimens from 200 individuals, which had a  
111 viral load of  $>10^3$  copies per microliter of transport media, adequate RT-PCR amplification of all  
112 eight genomic segments, and an average read coverage of  $>10^3$  across the genome (Table 1,  
113 Supplementary Figure 1).

114

115 We identified intrahost single nucleotide variants (iSNV) using our empirically validated analysis  
116 pipeline (McCrone & Lauring 2016). Our approach relies heavily on the variant caller DeepSNV,  
117 which uses a clonal plasmid control to distinguish between true iSNV and errors introduced  
118 during sample preparation and/or sequencing (Gerstung et al. 2012). Given the diversity of  
119 influenza viruses that circulate locally each season, there were a number of instances in which  
120 our patient-derived samples had mutations that were essentially fixed ( $>0.95$  frequency) relative  
121 to the clonal control. DeepSNV is unable to estimate an error rate for the control or reference  
122 base at these positions. We therefore performed an additional benchmarking experiment to  
123 identify a threshold for majority iSNV at which we could correctly infer whether or not the  
124 corresponding minor allele was also present (see Methods). We found that we could correctly  
125 identify a minor allele at a frequency of  $\geq 2\%$  when the frequency of the major allele was  $\leq 98\%$ .  
126 We therefore report data on iSNV present at frequencies between 2 and 98%. As expected, this  
127 threshold improved the specificity of our iSNV identification and decreased our sensitivity to

128 detect variants below 5% compared to our initial validation experiment (McCrone & Lauring  
129 2016), which did not employ a frequency threshold (Supplementary Table 1).  
130  
131 Consistent with our previous studies and those of others, we found that the within host diversity  
132 of human influenza A virus (IAV) populations is low (Poon et al. 2016; Dinis et al. 2016; Debbink  
133 et al. 2017; Sobel Leonard et al. 2016; McCrone & Lauring 2016). Two hundred forty-three out  
134 of the 249 samples had fewer than 10 minority iSNV (median 2, IQR 1-3). There were 6  
135 samples with greater than 10 minority iSNV. In 3 of these cases, the frequency of iSNVs were  
136 tightly distributed about a mean suggesting that the iSNV were linked and that the samples  
137 represented mixed infections. Consistent with this hypothesis, putative genomic haplotypes  
138 based on these minority iSNV clustered with distinct isolates on phylogenetic trees  
139 (Supplementary Figures 2 and 3). While viral shedding was well correlated with days post  
140 symptom onset (Figure 1A) the number of minority iSNV identified was not affected by the day  
141 of infection, viral load, subtype, or vaccination status (Figure 1B and Supplementary Figure 4).  
142  
143 The vast majority of minority variants were rare (frequency 0.02-0.07), and iSNV were  
144 distributed evenly across the genome (Figure 1C and 1D). The ratio of nonsynonymous to  
145 synonymous variants was 0.64 and was never greater than 1 in any 5% bin, which suggests  
146 that within host populations were under purifying selection. We also found that minority variants  
147 were rarely shared among multiple individuals. Ninety-five percent of minority iSNV were only  
148 found once, 4.7% were found in 2 individuals, and no minority iSNV were found in more than 3  
149 individuals. The low level of shared diversity suggests that within host populations were  
150 exploring distinct regions of sequence space with little evidence for parallel evolution. Of the 31  
151 minority iSNV that were found in multiple individuals (triangles in Figure 1D), 4 were  
152 nonsynonymous.  
153

154 Although the full range of the H3 antigenic sites have not been functionally defined, it is  
155 estimated that 131 of the 329 amino acids in HA1 lie in or near these sites (Lee & Chen 2004).  
156 We identified 17 minority nonsynonymous iSNV in these regions (Supplementary Table 2). Six  
157 of these were in positions that differ among antigenically drifted viruses (Smith et al. 2004; Wiley  
158 et al. 1981), and two (193S and 189N) lie in the “antigenic ridge” that is a major contributor to  
159 drift (Koel et al. 2013). Three of these have been detected at the global level as consensus  
160 variants since the time of isolation (128A, 193S and 262N) with two (193S and 262N) seemingly  
161 increasing in global frequency (Neher & Bedford 2015) (Supplementary Figure 5). Additionally,  
162 we identified 1 putative H1N1 antigenic variant (208K in C<sub>a</sub>) (Caton et al. 1982; Xu et al. 2010).  
163 In total, putative antigenic variants account for 1.0-2.5% of minority iSNV identified and were  
164 found in 3.5-8.0% of infections. None of these iSNV were shared among multiple individuals.

165

#### 166 *Estimation of effective population size*

167 Given the above observations, we hypothesized that within host populations of IAV are under  
168 purifying selection and that variants that rise to detectable levels do so by a neutral process as  
169 opposed to positive selection. Consistent with this hypothesis, we found that nonsynonymous  
170 and synonymous iSNV exhibited similar changes in frequency over time in the 35 individuals  
171 who provided serial specimens that contained iSNV (Figure 2A and 2B). We used a maximum  
172 likelihood approach to estimate the within host effective population size ( $N_e$ ) of IAV by fitting a  
173 diffusion approximation of the Wright-Fisher model (Kimura 1955). This model assumes that  
174 changes in iSNV frequency are due solely to random genetic drift and not selection, that iSNV  
175 are independent of one another, and that the effective population is sufficiently large to justify a  
176 continuous approximation to changes in allele frequency. The diffusion approximation of the  
177 Wright-Fisher model assigns probabilities to frequency changes given an  $N_e$  and the number of  
178 generations between sample times. In our model we fixed the within host generation time as  
179 either 6 or 12 hours (Geoghegan et al. 2016) and report the findings for the 6 hour generation

180 time below. We then asked what population size makes the observed changes in frequency  
181 most likely (Figure 2B). We restricted this analysis to samples taken at least 1 day apart ( $n = 29$ ),  
182 as there was very little change in iSNV frequency in populations sampled twice on the same day  
183 ( $R^2 = 0.986$ , Figure 2B and Supplementary Figure 6). The concordance of same day samples  
184 suggests that our sampling procedure is reproducible and that less than a generation had  
185 passed between samplings. Maximum likelihood optimization of this diffusion model revealed a  
186 within host effective population size of 35 (95% CI 26-46, Table 2).

187  
188 The diffusion approximation makes several simplifying assumptions, which if violated could  
189 influence our findings. To ensure our results were robust to the assumption of a large population,  
190 we employed a discrete interpretation of the Wright-Fisher model which makes no assumptions  
191 about population size (Williamson & Slatkin 1999). In this case we found an effective population  
192 size of 32 (95% CI 28-41), very close to our original estimate (Table 2). Both models assume  
193 complete independence of iSNV. To ensure this assumption did not affect our results, we fit the  
194 discrete model 1000 times, each time randomly subsetting our data such that only one iSNV per  
195 individual was included. This simulates a situation in which all modeled iSNV are independent  
196 and our assumption is met. Under these conditions we found a median effective population size  
197 of 33 (IQR 32-40), demonstrating negligible bias in the initial analysis due to correlation between  
198 iSNV.

199  
200 As above, most iSNV in the longitudinal samples were rare ( $< 10\%$ ) and many became extinct  
201 between samplings. To ensure that our models were capable of accurately estimating the  
202 effective population size from such data, we simulated 1000 Wright-Fisher populations with  
203 iSNV present at approximately the same starting frequencies as in our data set and an  $N_e$  of 30,  
204 50, or 100. In these simulations, we found mean  $N_e$  of 34, 56 and 117 (Figure 2C). These

205 simulations suggest that although this method may slightly overestimate the  $N_e$ , our results are  
206 not constrained by the data structure.

207

208 To this point, we have assumed that neutral processes are responsible for the observed  
209 changes in iSNV frequency within hosts. Although this assumption seems justified at least in  
210 part by the analysis above, we tested the robustness of our models by fitting the  
211 nonsynonymous ( $n = 27$ ) and synonymous iSNV ( $n = 36$ ) separately. Here, we estimated an  
212 effective population size of 30 using the nonsynonymous iSNV and an effective population size  
213 of 37 using the synonymous iSNV (Table 2). These estimates are very close to those derived  
214 from the whole dataset and suggest that nonsynonymous and synonymous mutations are  
215 influenced by similar within host processes. To further ensure that our results were not driven by  
216 a few outliers subject to strong selection, we ranked iSNV by their change in frequency over  
217 time and consecutively removed iSNV with the most extreme changes. We estimated the  
218 effective population size at each iteration and found that removing the top 50% most extreme  
219 iSNV only increased the effective population size to 161 (Figure 2D). Therefore, our estimates  
220 are robust to a reasonable number of non-neutral sites. Finally, we also applied a separate  
221 Approximate Bayesian Computational (ABC) method, which uses a non-biased moment  
222 estimator in conjunction with ABC to estimate the effective population size of a population as  
223 well as selection coefficients for the iSNV present (Foll et al. 2014). This distinct approach  
224 relaxes the previous assumption regarding neutrality. We applied this analysis to the 16  
225 longitudinal pairs that were sampled 1 day apart and estimated an effective population of 69.  
226 We were unable to reject neutrality for just 7 of the 35 iSNV in this data set (Figure 2E). These  
227 seven mutations consisted of 3 nonsynonymous and 4 synonymous mutations and were split  
228 between two individuals. None were putative antigenic variants.

229

230 *Identification of forty-three transmission pairs*

231 We analyzed virus populations from 85 households with concurrent infections to quantify the  
232 level of shared viral diversity and to estimate the size of the IAV transmission bottleneck (Table  
233 1). Because epidemiological linkage does not guarantee that concurrent cases constitute a  
234 transmission pair (Petrie et al. 2017), we used a stringent rubric to eliminate individuals in a  
235 household with co-incident community acquisition of distinct viruses. We considered all  
236 individuals in a household with symptom onset within a 7-day window to be epidemiologically  
237 linked. The donor in each putative pair was defined as the individual with the earlier onset of  
238 symptoms. We discarded a transmission event if there were multiple possible donors with the  
239 same day of symptom onset. Donor and recipients were not allowed to have symptom onset on  
240 the same day, unless the individuals were both index cases for the household. In these 6  
241 instances, we analyzed the data for both possible donor-recipient directionalities. Based on  
242 these criteria, our cohort had 124 putative household transmission events over 5 seasons  
243 (Table 1). Of these, 52 pairs had samples of sufficient quality for reliable identification of iSNV  
244 from both individuals.

245  
246 We next used sequence data to determine which of these 52 epidemiologically linked pairs  
247 represented true household transmission events as opposed to coincident community-acquired  
248 infections. We measured the genetic distance between influenza populations from each  
249 household pair by L1-norm and compared these distances to those of randomly assigned  
250 community pairs within each season (Figure 3A, see also trees in Supplementary Figures 2 and  
251 3). While the L1-norm of a pair captures differences between the populations at all levels, in our  
252 cohort, it was largely driven by differences at the consensus level. We only considered  
253 individuals to be a true transmission pair if they had a genetic distance below the 5th percentile  
254 of the community distribution of randomly assigned pairs (Figure 3A). Forty-seven household  
255 transmission events met this criterion (Figure 3B). Among these 47 sequence-validated  
256 transmission pairs, 3 had no iSNV in the donor and 1 additional donor appeared to have a

257 mixed infection. These four transmission events were removed from our bottleneck analysis as  
258 donors without iSNV are uninformative and mixed infections violate model assumptions of site  
259 independence (see Methods). We estimated the transmission bottleneck in the remaining 43  
260 high-quality pairs (37 H3N2, 6 H1N1, Figure 3B).

261  
262 A transmission bottleneck restricts the amount of genetic diversity that is shared by both  
263 members of a pair. We found that few minority iSNV were polymorphic in both the donor and  
264 recipient populations (Figure 3C). Minority iSNV in the donor were either absent or fixed in the  
265 recipient (top and bottom of plot). The lack of shared polymorphic sites (which would lie in the  
266 middle of the plot in Figure 3C) suggests a stringent effective bottleneck in which only one allele  
267 is passed from donor to recipient.

268  
269 *Estimation of the transmission bottleneck*

270 We applied a simple presence-absence model to quantify the effective transmission bottleneck  
271 in our cohort. The presence-absence model considers only whether or not a donor allele is  
272 present or absent in the recipient sample. Under this model, transmission is a neutral, random  
273 sampling process, and the probability of transmission is simply the probability that the iSNV will  
274 be included at least once in the sample given its frequency in the donor and the sample size, or  
275 bottleneck. We estimated a distinct bottleneck for each transmission pair and assumed these  
276 bottlenecks followed a zero-truncated Poisson distribution. This model also assumes that the  
277 sensitivity for detection of transmitted iSNVs is perfect and that each genomic site is  
278 independent of all others. We then used maximum likelihood optimization to determine the  
279 distribution of bottleneck sizes that best fit the data. We found a zero-truncated Poisson  
280 distribution with a mean of 1.66 ( $\lambda = 1.12$ ; 0.51-1.99, 95% CI) best described the data.  
281 This distribution indicates that the majority of bottlenecks are 1, and that very few are greater  
282 than 5 (probability 0.2%). There were no apparent differences between H3N2 and H1N1 pairs.



283 The model fit was evaluated by simulating each transmission event 1,000 times. The presence  
284 or absence of each iSNV in the recipient was noted and the probability of transmission given  
285 donor frequency determined. The range of simulated outcomes matched the data well, which  
286 suggests that transmission is a selectively neutral event characterized by a stringent bottleneck  
287 (Figure 3D).

288  
289 The majority of transmitted iSNV were fixed in the recipients. Although this trend matches the  
290 expectation given a small bottleneck, these data could also be consistent with a model in which  
291 the probability of transmission is determined by the frequency at which iSNV are found at the  
292 community level. To ensure our bottleneck estimates were an outcome of neutral transmission  
293 and not an artifact of the larger community population structure or selection for the community  
294 consensus, we created a null model by randomly assigning community “recipient-donor”  
295 pairings. Each community “recipient” was drawn from the pool of individuals that were infected  
296 after the “donor” but in the same season and with the same subtype as the donor. We then  
297 identified whether or not each donor iSNV was found in the community recipient and determined  
298 the relationship between “donor” frequency and probability of “transmission” for 1,000 such  
299 simulations. Given the low level of diversity in our cohort, we predicted that rare iSNV would be  
300 unlikely to be found in a random sample, while the major alleles should be fixed in most random  
301 pairs. This trend is clearly demonstrated in Figure 3E. It is also clear that this null model fit the  
302 data much more poorly than the presence/absence model, suggesting that the observed data in  
303 our bona fide transmission pairs were not a product of community metapopulation structure, but  
304 rather an outcome of neutral sampling events.

305  
306 Because our bottleneck estimates were much lower than what has previously been reported for  
307 human influenza (Poon et al. 2016), we investigated the impact that our simplifying assumptions  
308 could have on our results. In particular, the presence-absence model assumes perfect detection

309 of variants in donor and recipient, and it can therefore underestimate the size of a bottleneck in  
310 the setting of donor-derived variants that are transmitted but not detected in the recipient. These  
311 “false negative” variants can occur when the frequency of an iSNV drifts below the level of  
312 detection (e.g. 2% frequency) or when the sensitivity of sequencing is less than perfect for  
313 variants at that threshold (e.g. 15% sensitivity for variants at a frequency 2-5%). To determine  
314 the impact of sequencing sensitivity and specificity on our bottleneck estimates, we re-called  
315 variants using our original pipeline without the 2% frequency cut-off. As shown in  
316 Supplementary Table 1, this increases the sensitivity of iSNV detection in the 1-5% frequency  
317 range, and also the number of false positive variant calls (McCrone & Lauring 2016). This  
318 analysis only slightly increased average transmission bottleneck to 2.10 ( $\lambda = 1.67$ ; 0.91-  
319 2.71, 95% CI), and indicates that our results are not biased by the added stringency used in the  
320 initial analysis (Supplementary Figures 7A and 7B).

321  
322 To further investigate the impact of sequencing accuracy on our estimates, we inferred minor  
323 variants in our current pipeline (see above and methods) without a frequency cutoff. Ultimately,  
324 this reduced variant calling to a count method at a number of positions and greatly increased  
325 the number of shared minority iSNV in our samples (Supplementary Figure 7C). Many of these  
326 presumed false positive variant calls were at similar frequencies (0.1-2%) in donor and recipient.  
327 As such, the “apparent transmission” of rare variants drives an inflated estimate of the  
328 transmission bottleneck (118, see Supplementary Figure 7D). Simulation showed that this  
329 inflated bottleneck no longer fit the trend in the data, likely because the model is now forced to  
330 accommodate shared iSNV that are biased toward sequencing error as opposed to the actual  
331 transmission process.

332  
333 We also estimated bottleneck size using a beta binomial model, which Leonard *et al.* have used  
334 to account for the stochastic loss of transmitted variants. This model allows for a limited amount

335 of time-independent genetic drift within the recipient (Sobel Leonard et al. 2017), and we  
336 modified it to also account for our benchmarked sensitivity for rare variants (Supplementary  
337 Table 1, Current Pipeline). For all donor-derived iSNV that were absent in the recipient, we  
338 estimated the likelihood that these variants were transmitted but either drifted below our level of  
339 detection or drifted below 10% and were missed by our variant identification. Despite the  
340 relaxed assumptions provided by this modified beta binomial model, maximum likelihood  
341 estimation only marginally increased the average bottleneck size (mean 1.73: lambda 1.22;  
342 0.57-2.17, 95%CI) relative to the simpler presence-absence model. We simulated transmission  
343 and subsequent random drift using the beta binomial model and the estimated bottleneck  
344 distribution as above (Figure 3F). Although the model matched the data well, the fit was not  
345 better than that of the presence-absence model (AIC 83.0 for beta-binomial compared to 76.7  
346 for the presence-absence model).

347

#### 348 *The mutation rate of influenza A virus within human hosts*

349 The stringent influenza transmission bottleneck suggests that most infections are founded by  
350 one lineage and develop under essentially clonal processes. The diffusion approximation to the  
351 Wright-Fisher model (see above and Figure 2) can be used to predict the rate at which  
352 homogenous populations diversify from a clonal ancestor as a function of mutation rate and  
353 effective population size (Rouzine et al. 2001). Maximum likelihood optimization of this model  
354 suggested an *in vivo* neutral mutation rate of  $4 \times 10^{-6}$  mutations per nucleotide per replication  
355 cycle and a within host effective population size of 36 (given a generation time of 6 hours).  
356 These estimates are consistent with those above (Table 2). As we have recently estimated that  
357 13% of mutations in influenza A virus are neutral (Visher et al. 2016), we estimated that the true  
358 *in vivo* mutation rate would be approximately 8 fold higher than our neutral rate – on the order of  
359  $3-4 \times 10^{-5}$ . This *in vivo* mutation rate is close to our recently published estimate of influenza A

360 mutation rates in epithelial cells by fluctuation test (Pauly et al. 2017) and within the range of  
361 other estimates for IAV (Sanjuán et al. 2010).

362

### 363 **Discussion**

364 We find that seasonal influenza A viruses replicate within and spread among human hosts with  
365 very small effective population sizes. Because we used viruses collected over five influenza  
366 seasons from individuals enrolled in a prospective household cohort, these dynamics are likely  
367 to be broadly representative of many seasonal influenza infections in their natural transmission  
368 context. Our results are further strengthened by the use of a validated sequence analysis  
369 pipeline and models that are robust to the underlying assumptions. The small effective size of  
370 intrahost populations and the tight effective transmission bottleneck suggest that stochastic  
371 processes, such as genetic drift, dominate influenza virus evolution at the level of individual  
372 hosts. This stands in contrast to prominent role of positive selection in the global evolution of  
373 seasonal influenza.

374

375 While influenza virus populations are subject to continuous natural selection, selection is an  
376 inefficient driver of evolution in small populations (Rouzine et al. 2001). Despite a large viral  
377 copy number, our findings demonstrate that intrahost populations of influenza behave like much  
378 smaller populations. We therefore expect stochastic fluctuations to be the major force driving  
379 the fixation of novel variants within human hosts. This finding contradicts previous studies,  
380 which have found signatures of adaptive evolution in infected hosts (Gubareva et al. 2001;  
381 Rogers et al. 2015; Ghedin et al. 2011; Sobel Leonard et al. 2016). However, these studies rely  
382 on data from infections in which selective pressures are likely to be particularly strong (e.g. due  
383 to drug treatment or infection with a poorly adapted virus), or in which the virus has been  
384 allowed to propagate for extended periods of time (Xue et al. 2017). Under these conditions,

385 one can identify the action of positive selection on within host populations. We suggest that  
386 these are important and informative exceptions to the drift regime defined here.

387  
388 We used both a simple presence-absence model and a more complex beta binomial model to  
389 estimate an extremely tight transmission bottleneck. The estimation of a small bottleneck size is  
390 driven by low within-host diversity and very few minority iSNV shared among individuals in a  
391 transmission pair. While our methods for variant calling may be more conservative than those  
392 used in similar studies, we found that relaxing our variant calling criteria led to the inclusion of  
393 false positive variants that inflated our estimates. Furthermore, the beta binomial model  
394 accounts for false negative iSNV (i.e. variants that are transmitted but not detected in the donor),  
395 which can lead to underestimated transmission bottlenecks (Sobel Leonard et al. 2017). Our  
396 formulation of this model incorporates empirically determined sensitivity and specificity metrics  
397 to account for both false negative iSNV and false positive iSNV (McCrone & Luring 2016).  
398 Finally, if rare, undetected, iSNV were shared between linked individuals, we would expect to  
399 see transmission of more common iSNV (frequency 5-10%), which we can detect with high  
400 sensitivity. In our data, the transmission probability iSNVs > 5% frequency in the donor were  
401 also well predicted by small bottleneck size (Figure 3D).

402  
403 Although the size of our transmission bottleneck is consistent with estimates obtained for other  
404 viruses and in experimental animal models of influenza (Zwart & Elena 2015; Varble et al. 2014),  
405 it differs substantially from the only other study of bottlenecks in natural human infection (Poon  
406 et al. 2016; Sobel Leonard et al. 2017). While there are significant differences in the design and  
407 demographics of the cohorts, the influenza seasons under study, and sequencing methodology  
408 (Kugelman et al. 2017), the bottleneck size estimates are fundamentally driven by the amount of  
409 viral diversity shared among individuals in a household. Importantly, we used both  
410 epidemiologic linkage and the genetic relatedness of viruses in households to define

411 transmission pairs and to exclude confounding from the observed background diversity in the  
412 community. We find that household transmission pairs and randomly assigned community pairs  
413 had distinct patterns of shared consensus and minority variant diversity. The comparison to  
414 random community pairs is important, as an unexplained aspect of the work of Poon et al. is  
415 that rare iSNV were frequently shared by randomly selected individuals, and more common  
416 ones were not (Poon et al. 2016).

417

418 Our estimates of IAV population dynamics are consistent across three separate models and  
419 partitions of the data. The measurements of shared diversity are influenced by both between  
420 and within host processes, and the transmission bottleneck is entirely consistent with the small  
421 within host population size derived from the longitudinal samples. We also jointly estimated the  
422 *in vivo* mutation rate and effective population size based on the frequency distribution of minor  
423 alleles observed in the entire cohort. This model assumed a small transmission bottleneck,  
424 produced a mutation rate that is consistent with previous estimates, and independently  
425 reproduced the within host population size estimate. Given the concordance among these  
426 distinct approaches, it is unlikely that our findings are biased by hidden assumptions or model  
427 limitations.

428

429 Accurately modeling and predicting influenza virus evolution requires a thorough understanding  
430 of the virus' population structure. Some models have assumed a large intrahost population and  
431 a relatively loose transmission bottleneck (Geoghegan et al. 2016; Russell et al. 2012; Peck et  
432 al. 2015). Here, adaptive iSNV can rapidly rise in frequency and low frequency variants can  
433 have a high probability of transmission. In such a model, it would be possible for the highly  
434 pathogenic H5N1 virus to develop the requisite 4-5 mutations to become transmissible through  
435 aerosols during a single acute infection of a human host (Herfst et al. 2012; Russell et al. 2012).  
436 Although the dynamics of emergent avian influenza and human adapted seasonal viruses likely

437 differ (Petrova & Russell 2017), our work suggests that fixation of multiple mutations over the  
438 course of a single acute infection is unlikely.

439  
440 While it may seem counterintuitive that influenza evolution is dominated by drift on local scales  
441 and positive selection on global scales, these models are certainly not in conflict. Within  
442 individuals we have shown that the effective population is quite small, which suggests that  
443 selection is inefficient. Indeed, we have deeply sequenced 332 intrahost populations from 283  
444 individuals collected over more than 11,000 person-seasons of observation and only identified a  
445 handful of minority antigenic variants with little evidence for positive selection (this work and  
446 (Debbink et al. 2017)). However, with several million infected individuals each year, even  
447 inefficient processes and rare events are likely to happen at a reasonable frequency on a global  
448 scale.

449

## 450 **Methods**

451

### 452 *Description of the cohort*

453 The HIVE cohort (Monto et al. 2014; Ohmit et al. 2013; Ohmit et al. 2015; Ohmit et al. 2016;  
454 Petrie et al. 2013), established at the UM School of Public Health in 2010, enrolled and followed  
455 households of at least 3 individuals with at least two children <18 years of age; households  
456 were then followed prospectively throughout the year for ascertainment of acute respiratory  
457 illnesses. Study participants were queried weekly about the onset of illnesses meeting our  
458 standard case definition (two or more of: cough, fever/feverishness, nasal congestion, sore  
459 throat, body aches, chills, headache if  $\geq 3$  yrs old; cough, fever/feverishness, nasal  
460 congestion/runny nose, trouble breathing, fussiness/irritability, decreased appetite, fatigue in <3  
461 yrs old), and the symptomatic participants then attended a study visit at the research clinic on  
462 site at UM School of Public Health for sample collection. For the 2010-2011 through 2013-2014

463 seasons, a combined nasal and throat swab (or nasal swab only in children < 3 years of age)  
464 was collected at the onsite research clinic by the study team. Beginning with the 2014-2015  
465 seasons, respiratory samples were collected at two time points in each participant meeting the  
466 case definition; the first collection was a self- or parent-collected nasal swab collected at illness  
467 onset. Subsequently, a combined nasal and throat swab (or nasal swab only in children < 3  
468 years of age) was collected at the onsite research clinic by the study team. Families with very  
469 young children (< 3 years of age) were followed using home visits by a trained medical assistant.

470

471 Active illness surveillance and sample collection for cases were conducted October through  
472 May and fully captured the influenza season in Southeast Michigan in each of the study years.  
473 Data on participant, family and household characteristics, and on high-risk conditions were  
474 additionally collected by annual interview and review of each participant's electronic medical  
475 record. In the current cohort, serum specimens were also collected twice yearly during fall  
476 (November-December) and spring (May-June) for serologic testing for antibodies against  
477 influenza.

478

479 This study was approved by the Institutional Review Board of the University of Michigan Medical  
480 School, and all human subjects provided informed consent.

481

#### 482 *Identification of influenza virus*

483 Respiratory specimens were processed daily to determine laboratory-confirmed influenza  
484 infection. Viral RNA was extracted (Qiagen QIAamp Viral RNA Mini Kit) and tested by RT-PCR  
485 for universal detection of influenza A and B. Samples with positive results by the universal  
486 assay were then subtyped to determine A(H3N2), A(H1N1), A(pH1N1) subtypes and  
487 B(Yamagata) and B(Victoria) lineages. We used primers, probes and amplification parameters  
488 developed by the Centers for Disease Control and Prevention Influenza Division for use on the



489 ABI 7500 Fast Real-Time PCR System platform. An RNaseP detection step was run for each  
490 specimen to confirm specimen quality and successful RNA extraction.

491

#### 492 *Quantification of viral load*

493 Quantitative reverse transcription polymerase chain reaction (RT-qPCR) was performed on 5µl  
494 RNA from each sample using CDC RT-PCR primers InfA Forward, InfA Reverse, and InfA  
495 probe, which bind to a portion of the influenza M gene (CDC protocol, 28 April 2009). Each  
496 reaction contained 5.4µl nuclease-free water, 0.5µl each primer/probe, 0.5µl SuperScript III  
497 RT/Platinum Taq mix (Invitrogen 111732) 12.5µl PCR Master Mix, 0.1µl ROX, 5µl RNA. The  
498 PCR master mix was thawed and stored at 4°C, 24 hours before reaction set-up. A standard  
499 curve relating copy number to Ct value was generated based on 10-fold dilutions of a control  
500 plasmid run in duplicate.

501

#### 502 *Illumina library preparation and sequencing*

503 We amplified cDNA corresponding to all 8 genomic segments from 5µl of viral RNA using the  
504 SuperScript III One-Step RT-PCR Platinum Taq HiFi Kit (Invitrogen 12574). Reactions consisted  
505 of 0.5µl Superscript III Platinum Taq Mix, 12.5µl 2x reaction buffer, 6µl DEPC water, and 0.2µl  
506 of 10µM Uni12/Inf1, 0.3µl of 10µM Uni12/Inf3, and 0.5µl of 10µM Uni13/Inf1 universal influenza  
507 A primers (Zhou et al. 2009). The thermocycler protocol was: 42°C for 60 min then 94°C for 2  
508 min then 5 cycles of 94°C for 30 sec, 44°C for 30 sec, 68°C for 3 min, then 28 cycles of 94°C for  
509 30 sec, 57°C for 30 sec, 68°C for 3 min. Amplification of all 8 segments was confirmed by gel  
510 electrophoresis, and 750ng of each cDNA mixture were sheared to an average size of 300 to  
511 400bp using a Covaris S220 focused ultrasonicator. Sequencing libraries were prepared using  
512 the NEBNext Ultra DNA library prep kit (NEB E7370L), Agencourt AMPure XP beads (Beckman  
513 Coulter A63881), and NEBNext multiplex oligonucleotides for Illumina (NEB E7600S). The final  
514 concentration of each barcoded library was determined by Quanti PicoGreen dsDNA

515 quantification (ThermoFisher Scientific), and equal nanomolar concentrations were pooled.  
516 Residual primer dimers were removed by gel isolation of a 300-500bp band, which was purified  
517 using a GeneJet Gel Extraction Kit (ThermoFisher Scientific). Purified library pools were  
518 sequenced on an Illumina HiSeq 2500 with 2x125 nucleotide paired end reads. All raw  
519 sequence data have been deposited at the NCBI sequence read archive (BioProject submission  
520 ID: SUB2951236). PCR amplicons derived from an equimolar mixture of eight clonal plasmids,  
521 each containing a genomic segment of the circulating strain were processed in similar fashion  
522 and sequenced on the same HiSeq flow cell as the appropriate patient derived samples. These  
523 clonally derived samples served as internal controls to improve the accuracy of variant  
524 identification and control for batch effects that confound sequencing experiments.

525

#### 526 *Identification of iSNV*

527 Intrahost single nucleotide variants were identified in samples that had greater than  $10^3$   
528 genomes/ $\mu$ l and an average coverage  $>1000x$  across the genome. Variants were identified  
529 using DeepSNV and scripts available at [https://github.com/lauringlab/variant\\_pipeline](https://github.com/lauringlab/variant_pipeline) as  
530 described previously (McCrone & Luring 2016) with a few minor and necessary modifications.  
531 Briefly, reads were aligned to the reference sequence (H3N2 2010-2011 & 2011-2012 :  
532 GenBank CY121496-503, H3N2 2012-2013:GenBank KJ942680-8, H3N2 2014-2015 : Genbank  
533 CY207731-8, H1N1 GenBank : CY121680-8) using Bowtie2 (35). Duplicate reads were then  
534 marked and removed using Picard (<http://broadinstitute.github.io/picard/>). We identified putative  
535 iSNV using DeepSNV. Bases with phred  $<30$  were masked. Minority iSNV (frequency  $<50\%$ )  
536 were then filtered for quality using our empirically determined quality thresholds (p-value  $<0.01$   
537 DeepSNV, average mapping quality  $>30$ , average Phred  $>35$ , average read position between  
538 31 and 94). To control for PCR errors in samples with lower input titers, all isolates with titers  
539 between  $10^3$  and  $10^5$  genomes/ $\mu$ l were processed and sequenced in duplicate. Only iSNV that  
540 were found in both replicates were included in down stream analysis. The frequency of the

541 variant in the replicate with higher coverage at the iSNV location was assigned as the frequency  
542 of the iSNV. Finally, any SNV with a frequency below 2% was discarded.

543  
544 Given the diversity of the circulating strain in a given season, there were a number of cases in  
545 which isolates contained mutations that were essentially fixed (>95%) relative to the plasmid  
546 control. Often in these cases, the minor allele in the sample matched the major allele in the  
547 plasmid control. We were, therefore, unable to use DeepSNV in estimating the base specific  
548 error rate at this site for these minor alleles and required an alternative means of eliminating  
549 true and false minority iSNV. To this end we applied stringent quality thresholds to these  
550 putative iSNV and implemented a 2% frequency threshold. In order to ensure we were not  
551 introducing a large number of false positive iSNV into our analysis, we performed the following  
552 experiment. Perth (H3N2) samples were sequenced on the same flow cell as both the Perth and  
553 Victoria (H3N2) plasmid controls. Minority iSNV were identified using both plasmid controls. This  
554 allowed us to identify rare iSNV at positions in which the plasmid controls differed both with and  
555 without the error rates provided by DeepSNV. We found that at a frequency threshold of 2% the  
556 methods were nearly identical (NPV of 1, and PPV of 0.94 compared to DeepSNV).

557

#### 558 *Overview of models for effective population size*

559 We estimated the effective population size using two separate interpretations of a Wright-Fisher  
560 population (Ewens 2004). At its base, the Wright-Fisher model describes the expected changes  
561 in allele frequency of an ideal population, which is characterized by non-overlapping generations,  
562 no migration, no novel mutation, and no population structure. We then asked what size effective  
563 population would make the changes in frequency observed in our dataset most likely. We  
564 calculated these values using two applications of the Wright-Fisher model (i) a diffusion  
565 approximation (Kimura 1955) and (ii) a maximum likelihood approach based on the discrete  
566 interpretation (Williamson & Slatkin 1999).

567

568 For these estimates we restricted our analysis to longitudinal samples from a single individual  
569 that were separated by at least 1 day and only used sites that were polymorphic in the initial  
570 sample (29 of the 49 total serial sample pairs). We modeled only the iSNV that were the minor  
571 allele at the first time point, and we assumed a within host generation time of either 6 or 12  
572 hours as proposed by Geoghegan *et al.* (Geoghegan *et al.* 2016).

573

#### 574 *Diffusion approximation*

575 The diffusion approximation was first solved by Kimura in 1955 (Kimura 1955). This  
576 approximation to the discrete Wright-Fisher model has enjoyed widespread use in population  
577 genetics as it allows one to treat the random time dependent probability distribution of final allele  
578 frequencies as a continuous function (e.g. (Zanini *et al.* 2017; Kimura & Ohta 1969; Kimura  
579 1971; Myers *et al.* 2008)). Here, we also included the limitations in our sensitivity to detect rare  
580 iSNV by integrating over regions of this probability density that were either below our limit of  
581 detection or within ranges where we expect less than perfect sensitivity as follows.

582

583 Let  $P(p_0, p_t, t | N_e)$  be the time dependent probability of a variant drifting from an initial  
584 frequency of  $p_0$  at time 0  $p_t$  at time  $t$  generations given an effective population size of  $N_e$  where  
585  $0 < p_t < 1$ .

586

587 The time dependent derivative of this probability has been defined using the Kolmogorov  
588 forward equation (Kimura 1955) and for haploid populations is:

589

$$P(p_0, p_t, t | N_e) = \sum_{i=1}^{\infty} p_0 q_0 i(i+1)(2i+1)F(1-i, i+2, 2, p) \times F(1-i, i+2, 2, p_t) e^{-\left[\frac{i(i+1)}{2N_e}\right]t}$$

590

(1)

591

592 Where  $q = 1 - p$  and  $F$  is the hypergeometric function. We approximated the infinite sum by  
593 summing over the first 50 terms. When we added an additional 50 terms (100 in total) we found  
594 no appreciable change in the final log likelihoods.

595

596 We denote the frequency of allele that is not observed at the second time point as  $p_t \approx 0$  and  
597 the probability of such an event as  $P(p_0, p_t \approx 0, t | N_e)$ . This probability is given in equation 2 as  
598 the sum of the probability that the variant is truly lost by generation  $t$  (i.e. the other allele is fixed  
599  $P(q_0, q_t = 1, t | N_e)$ ), the probability that it is present but below the limit of detection (i.e.  
600  $P(p, p_t \approx 0, t | 0 < p_t < 0.02, N_e)$ ) and the probability the variant is not detected due to low  
601 sensitivity for rare variant detection (i.e.  $P(p_0, p_t \approx 0, t | 0.02 < p_t < 0.1, N_e)$ ). The probability of  
602 not observing an allele at the second time is then

603

$$P(p_0, p_t \approx 0, t | N_e) = P(q_0, 1, t | N_e) + P(p, p_t \approx 0, t | 0 < p_t < 0.02, N_e) + P(p_0, p_t \approx 0, t | 0.02 < p_t < 0.1, N_e) \quad (2)$$

604

605  
606  
607 The first term in equation 2 is adapted from Kimura, 1955 as

608

$$P(q_0, 1, t | N_e) = q_0 + \sum_{i=1}^{\infty} (2i + 1)p_0q_0(-1)^i F(1 - i, i + 2, 2, q_0)e^{-[i(i+1)/2N_e]t} \quad (3)$$

609

610 Where  $q$  is defined as above. (Note that this is simply the probability of fixation for a variant at  
611 initial frequency  $q$ ). As in equation 1 the infinite sum was approximated with a partial sum of 50  
612 terms.

613

614 The probability of the allele drifting below our limit of detection can be found by integrating  
615 equation 1 between 0 and our limit of detection, 0.02. This was done numerically using the  
616 python package scipy.

617

$$P(p_0, p_t \approx 0, t \mid 0 < p_t < 0.02, N_e) = \int_0^{0.02} P(p_0, p_t, t \mid N_e) dp_t$$

618 (4)

619 Finally, the probability of an iSNV being present at the second time point, but escaping detection,  
620 is given by the integral of equation 1 between our benchmarked frequencies (0.02,0.05) times  
621 the false negative rate for that range. Here, we assumed the entire range had the same  
622 sensitivity as the benchmarked frequency at the lower bound and rounded recipient titers down  
623 to the nearest  $\log_{10}$  titer (e.g.  $10^3, 10^4, 10^5$ ). We also assumed perfect sensitivity above 10%.

624

$$P(p_0, p_t \approx 0, t \mid 0.02 < p_t < 0.1, N_e) = \sum_{f_i}^{[0.02, 0.05, 0.10]} (\text{FNR} \mid \text{Titer}_r, f_i) \int_{f_i}^{f_{i+1}} P(p_0, p_t, t \mid N_e) dp_t$$

625 (5)

626 Where  $(\text{FNR} \mid \text{Titer}_r, f_i)$  is the false negative rate given the frequency and the sample titer (See  
627 Supplemental Table 1) and  $P(p_0, p_t, t \mid N_e)$  is defined in equation 1.

628

629 The log likelihood of an effective population size is the sum of the log of  $P(p_0, p_t, t \mid N_e)$  for each  
630 minor allele in the data set, where either the position is polymorphic at time  $t$  (i.e. equation 1) or  
631 the allele is not observed at time  $t$  (i.e. equation 2).

632

633 *Discrete Wright-Fisher estimation of  $N_e$*

634 The diffusion approximation treats changes in frequency as a continuous process because it  
635 assumes sufficiently large  $N_e$ . That assumption can be relaxed, and the effective population size

636 can be determined, by applying a maximum likelihood method developed by Williamson and  
637 Slatkin 1999 (Williamson & Slatkin 1999). In this model, the true allele frequencies move  
638 between discrete states (i.e. the frequency must be of the form  $i/N_e$  where  $i$  is a whole number  
639 in the range  $[0, N_e]$ . In the original application, allele counts were used, and sampling error was  
640 added to the model as a binomial distribution with  $n$  determined by the sample size. Here, we  
641 use the frequencies available from next generation sequencing and estimate sampling error as  
642 a normal distribution with mean equal to the observed frequency and a standard deviation equal  
643 to that observed in our benchmarking study for the  $10^4$  genomes/ $\mu$ l samples ( $\sigma = 0.014$ )  
644 (McCrone & Lauring 2016).

645  
646 In this model, the probability of observing an allele frequency shift from  $\hat{p}_0$  to  $\hat{p}_t$  in  $t$  generations  
647 provided an effective population of  $N_e$  is the probability of observing  $\hat{p}_0$  given some initial state  
648  $p_0$  and the probability of the population having that state, times the probability of observing  $\hat{p}_t$   
649 given some final state  $p_t$  and the probability of moving from the initial to the final state summed  
650 across all possible states.

$$P(p_0, p_t | N_e) = \sum_{p_0, p_t} P(\hat{p}_0 | p_0)P(p_0 | N_e)P(\hat{p}_t | p_t)P(p_t | p_0, N_e)$$

651 (6)

652  
653 Where  $\hat{p}_x$  are the observed probabilities and  $p_x$  are the real ones (of the form  $i/N_e$  discussed  
654 above). The likelihood of observing a given frequency  $\hat{p}_x$  given a defined state  $p_x$  is given by the  
655 likelihood of drawing  $\hat{p}_x$  from a normal distribution with mean  $p_x$  and standard deviation 0.014.

656

$$P(\hat{p}_x | p_x) = \text{Norm}(p_x, 0.014)$$

657 (7)

658 As in Williamson and Slatkin 1999, we assume a uniform prior on the initial state. Because we  
 659 know that our specificity is near perfect (above 2%, Supplemental Table 1) and we restrict our  
 660 analysis to only polymorphic sites, the probability of any initial state is given by

$$P(p_0 | N_e) = \frac{1}{N_e - 1}$$

662 (8)

663  
 664 and finally the probability of moving from one state to another in  $t$  generations is given by

$$P(p_t, p_0 | N_e) = v_0 M^t v_t$$

666 (9)

667 Where  $M$  is a square transmission matrix with  $N_e + 1$  rows and columns. Where  $m_{i,j}$  is the  
 668 probability of going from the  $i$ th configuration to the  $j$ th or the probability of drawing  $j - 1$  out of  
 669 binomial distribution with mean  $(i - 1)/N_e$  and a sample size  $N_e$ .  $v_0$  is a row vector of initial  
 670 frequencies  $p_0$  with 100% chance of initial state  $p_0$ , and  $v_t$  is column vector of the frequencies at  
 671 time point  $t$  with 100% chance of the final state. In other words  $v_0$  is a row vector of  $N_e + 1$   
 672 states with 0 everywhere except in the  $i$ th position where  $\frac{i-1}{N_e} = p_0$ , and  $v_t$  is a column vector of  
 673  $N_e + 1$  states with 0 everywhere except the  $j$ th position where  $\frac{j-1}{N_e} = p_t$

674 Using the scalar and cumulative properties of matrix multiplication equation 6 reduces to  
 675

$$P(p_0, p_t | N_e) = [0, P(p_0 | q_{0_2})P(q_{0_2} | N_e), \dots, P(p_0 | q_{0_{N_e-1}})P(q_{0_{N_e-1}} | N_e), 0] M^t \begin{bmatrix} P(p_t | q_{t_1}) \\ \vdots \\ P(p_t | q_{t_{N_e}}) \end{bmatrix}$$

676 (10)



677 The first and last entries in  $v_0$  are 0 because we assume all measured sites represent  
678 polymorphisms at the first time of sampling. As above, the log likelihood of a given population  
679 size is then simply the sum of the log of  $P(\hat{p}_0, \hat{p}_t, t | N_e)$  for each minor allele in the data set.

680

#### 681 *Simulations*

682 To simulate within host evolution we set  $N_e$  in equation 10 to either 30, 50 or 100. For each  
683 minor allele we used the closest available non-zero state given the effective population size as  
684 the starting state. We then calculated the probability of moving to any other state and selected a  
685 final state from this distribution. We then drew a final measured frequency from the normal  
686 distribution to account for measurement errors.

687

#### 688 *ABC model*

689 We estimated both the effective population size and selection coefficients using the approximate  
690 Bayesian computation (ABC) described in (Foll et al. 2014) with the WFACB\_v1.1 software  
691 provided in (Foll et al. 2015). In its current implementation, this analysis requires the same time  
692 points for each sample, and we restricted this analysis to longitudinal samples taken 1 day apart.  
693 This subset constitutes 16 of the 29 modeled longitudinal samples. Briefly, we subsampled  
694 polymorphic sites to 1,000x coverage to estimate allele counts from frequency data as in (Foll et  
695 al. 2014). We then estimated the prior distribution of the effective population size using 10,000  
696 bootstrap replicates. We selected a uniform distribution on the range [-0.5,0.5] as the prior  
697 distribution for the selection coefficients. The posterior distributions were determined from  
698 accepting the top 0.01% of 100,000 simulations.

699

#### 700 *Overview of models used for estimating the transmission bottleneck*

701 We model transmission as a simple binomial sampling process (Sobel Leonard et al. 2017). In  
702 our first model, we assume any transmitted iSNV, no matter the frequency, will be detected in

703 the recipient. In the second, we relax this assumption and account for false negative iSNV in the  
704 recipient. To include the variance in the transmission bottlenecks between pairs we use  
705 maximum likelihood optimization to fit the average bottleneck size assuming the distribution  
706 follows a zero-truncated Poisson distribution.

707

#### 708 *Presence/Absence model*

709 The presence/absence model makes several assumptions. We assume perfect detection of all  
710 transmitted iSNV in the recipient. For each donor iSNV, we measure only whether or not the  
711 variant is present in the recipient. Any iSNV that is not found in the recipient is assumed to have  
712 not been transmitted. We also assume the probability of transmission is determined only by the  
713 frequency of the iSNV in the donor at the time of sampling (regardless of how much time passes  
714 between sampling and transmission). The probability of transmission is simply the probability  
715 that the iSNV is included at least once in a sample size equal to the bottleneck. Finally, we  
716 assume all genomic sites are independent of one another. For this reason, we discarded the  
717 one case where the donor was likely infected by two strains, as the iSNV were certainly linked.

718

719 In our within host models, we only tracked minor alleles as in our data set we only ever find 2  
720 alleles at each polymorphic site. In this case, the frequency of the major allele is simply one  
721 minus the frequency of the minor allele. Because the presence/absence model is unaware of  
722 the frequency of alleles in the recipient we must track both alleles at each donor polymorphic  
723 site.

724

725 Let  $A_1$  and  $A_2$  be alleles in donor  $j$  at genomic site  $i$ . Let  $P(A_1)$  be the probability that  $A_1$  is the  
726 only transmitted allele. There are three possible outcomes for each site. Either only  $A_1$  is  
727 transmitted, only  $A_2$  is transmitted, or both  $A_1$  and  $A_2$  are transmitted. The probability of only  $A_1$   
728 being transmitted given a bottleneck size of  $N_b$  is

729

$$P_{i,j}(A_1 | N_b) = p_1^{N_b}$$

730 (11)

731 where  $p_1$  is the frequency of  $A_1$  in the donor. In other words, this is simply the probability of only

732 drawing  $A_1$  in  $N_b$  draws. The probability that only  $A_2$  is transmitted is similarly defined.

733

734 The probability of both alleles being transmitted is given by

735

$$P_{i,j}(A_1, A_2 | N_b) = 1 - (p_1^{N_b} + p_2^{N_b})$$

736 (12)

737 where  $p_1$  and  $p_2$  are the frequencies of the alleles respectively. This is simply the probability of

738 not picking only  $A_1$  or only  $A_2$  in  $N_b$  draws.

739

740 This system could easily be extended to cases where there are more than 2 alleles present at a

741 site; however, that never occurs in our data set.

742

743 For ease we will denote the likelihood of observing the data at a polymorphic site  $i$  in each

744 donor  $j$  given the bottleneck size  $N_b$  as  $P_{i,j}(N_b)$  where  $P_{i,j}(N_b)$  is defined by equation 11 if only

745 one allele is transmitted and equation 12 if two alleles are transmitted.

746

747 The log likelihood of a bottleneck of size  $N_b$  is given by

748

$$LL(N_b) = \sum_j \sum_i \text{Ln}(P_{i,j})$$

749 (13)

750

751 where  $i, j$  refers to the  $i$ th polymorphic site in the  $j$ th donor. This is the log of the probability of  
752 observing the data summed over all polymorphic sites across all donors.

753  
754 Because the bottleneck size is likely to vary across transmission events, we used maximum  
755 likelihood to fit the bottleneck distribution as oppose to fitting a single bottleneck value. Under  
756 this model we assumed the bottlenecks were distributed according to a zero-truncated Poisson  
757 distribution parameterized by  $\lambda$ . The likelihood of observing the data given a polymorphic site  $i$   
758 in donor  $j$  and  $\lambda$  is

$$P_{i,j}(\lambda) = \sum_{N_b=1}^{\infty} P_{i,j}(N_b)P(N_b | \lambda)$$

759 (14)

760  
761 where  $P_{i,j}(N_b)$  is defined as above,  $P(N_b | \lambda)$  is the probability of drawing a bottleneck of size  $N_b$   
762 from a zero-truncated Poisson distribution with a mean of  $\frac{\lambda}{1-e^{-\lambda}}$ . The sum is across all possible  
763  $N_b$  defined on  $[1, \infty]$ . For practical purposes, we only investigated bottleneck sizes up to 100, as  
764 initial analyses suggested  $\lambda$  is quite small and the probability of drawing a bottleneck size of 100  
765 from a zero-truncated Poisson distribution with  $\lambda = 10$  is negligible. We follow this convention  
766 whenever this sum appears.

767  
768 The log likelihood of  $\lambda$  for the data set is given by

769

$$LL(\lambda) = \sum_j \sum_i \text{Ln} \left( \sum_{N_b=1}^{\infty} P_{i,j}(N_b)P(N_b | \lambda) \right)$$

770 (15)

771

772 *Beta Binomial model*

773 The Beta binomial model is explained in detail in Leonard *et al.* (Sobel Leonard et al. 2017). It is  
774 similar to the presence/absence model in that transmission is modeled as a simple sampling  
775 process; however, it relaxes the following assumptions. In this model, the frequencies of  
776 transmitted variants are allowed to change between transmission and sampling according a  
777 beta distribution. The distribution is not dependent on the amount of time that passes between  
778 transmission and sampling, but rather depends on the size of the founding population (here  
779 assumed to equal to  $N_b$ ) and the number of variant genomes present in founding population  $k$ .  
780 Note the frequency in the donor is assumed to be the same between sampling and transmission.

781  
782 The equations below are very similar to those presented by Leonard *et al.* with one exception.  
783 Because we know the sensitivity of our method to detect rare variants based on the expected  
784 frequency and the titer, we can include the possibility that iSNV are transmitted but are missed  
785 due to poor sensitivity. Because the beta binomial model is aware of the frequency of the iSNV  
786 in the recipient, no information is added by tracking both alleles at a genomic site  $i$ .

787 Let  $p_{i,j_d}$  represent the frequency of the minor allele frequency at position  $i$  in the donor of some  
788 transmission pair  $j$ . Similarly, let  $p_{i,j_r}$  be the frequency of that same allele in the recipient of the  
789  $j$ th transmission pair. Then, as in Leonard *et al.*, the likelihood of some bottleneck  $N_b$  for the  
790 data at site  $i$  in pair  $j$  where the minor allele is transmitted is given by

791

$$L(N_b)_{i,j} = \sum_{k=1}^{N_b} p\_beta(p_{i,j_r} | k, N_b - k) p\_bin(k | N_b, p_{i,j_d})$$

792 (16)

793  
794 Where  $p\_beta$  is the probability density function for the beta distribution and  $p\_bin$  is the  
795 probability mass function for the binomial distribution.

796

797 This is the probability density that the transmitted allele is found in the recipient at a frequency  
798 of  $p_{i,j_r}$  given that the variant was in  $k$  genomes in a founding population of size  $N_b$  times the  
799 probability of drawing  $k$  variant genomes in a sample size of  $N_b$  and a variant frequency of  $p_{i,j_d}$ .

800 This is then summed for all possible  $k$  where  $1 \leq k \leq N_b$ .

801

802 As in equation 14 the likelihood of a zero truncated Poisson with a mean of  $\frac{\lambda}{1-e^{-\lambda}}$  given this  
803 transmitted variants is then given by

804

$$L(\lambda)_{i,j}^{\text{transmitted}} = \sum_{N_b=1}^{\infty} L(N_b)_{i,j} P(N_b | \lambda)$$

805 (17)

806

807 This is simply the likelihood of each  $N_b$  weighted by the probability of drawing a bottleneck size  
808 of  $N_b$  from bottleneck distribution.

809

810 In this model, there are three possible mechanisms for a donor iSNV to not be detected in the  
811 recipient. (i) The variant was not transmitted. (ii) The variant was transmitted but is present  
812 below our level of detection (2%). (iii) The variant was transmitted and present above our level  
813 of detection but represents a false negative in iSNV identification.

814

815 As in Leonard *et al.*, the likelihood of scenarios (i) and (ii) for a given  $N_b$  are expressed as

816

$$L(N_b)_{i,j}^{\text{lost}} = \sum_{k=0}^{N_b} \text{p\_beta\_cdf}(p_{i,j_r} < 0.02 | k, N_b - k) \text{p\_bin}(k | N_b, p_{i,j_d})$$

817 (18)

818

819 Where `p_beta_cdf` is the cumulative distribution function for the beta distribution. Note that if  
 820  $k = 0$  (i.e. the iSNV was not transmitted) then the term reduces to the probability of not drawing  
 821 the variant in  $N_b$  draws.

822

823 The likelihood of the variant being transmitted but not detected in the recipient given a  
 824 bottleneck of  $N_b$  is described by

825

$$L(N_b)_{i,j}^{\text{missed}} = \sum_{k=0}^{N_b} \sum_{f_e \in [0.02, 0.05, 0.1]} \text{p\_beta\_cdf}(f_e < p_{i,j_r} < f_{e+1} \mid k, N_b - k) \times \text{p\_bin}(k \mid N_b, p_{i,j_d})(\text{FNR} \mid \text{Titer}_r, f_e) \quad (19)$$

826  
827

828

829 This is the likelihood of the variant existing in the ranges [0.02,0.05] or [0.05,0.1] given an initial  
 830 frequency of  $k/N_b$  and a bottleneck size of  $N_b$  multiplied by the expected false negative rate  
 831 (FNR) given the titer of the recipient and the lower frequency bound. As in our diffusion model,  
 832 we assumed perfect sensitivity for detection of iSNV present above 10%, rounded recipient  
 833 titers down to the nearest  $\log_{10}$  titer (e.g.  $10^3, 10^4, 10^5$ ) and assumed the entire range  $[f_e, f_{e+1}]$   
 834 has the same sensitivity as the lower bound.

835

836 The likelihood of  $\lambda$  for iSNV that are not observed in the recipient is then given by summing  
 837 equations 18 and 19 across all possible  $N_b$ .

838

$$L(\lambda)_{i,j}^{\text{nontransmitted}} = \sum_{N_b=1}^{\infty} (L(N_b)_{i,j}^{\text{lost}} + L(N_b)_{i,j}^{\text{missed}}) P(N_b \mid \lambda) \quad (20)$$

839

840  
841 The log likelihood of the total dataset is then determined by summing log of equations 17 and 20  
842 (as applicable) across all polymorphic sites in each donor. (As before here we sum of  $N_b$  within  
843 the range [1,100].)

844  
845 *Simulation*

846 In order evaluate the fits of the two transmission models, we simulated whether or not each  
847 donor iSNV was transmitted or not. This involved converting each model to a presence absence  
848 model. In each simulation, we assigned a bottleneck from the bottleneck distribution for each  
849 transmission pair. We then determined the probability of only transmitting one allele ( $A_x$  where  
850  $x \in [1,2]$  as in the presence/absence model above) and the probability of transmitted both  
851 alleles ( $A_1, A_2$  above) for each polymorphic site.

852  
853 For the presence/absence model, the probabilities for each possible outcome are given by  
854 equations 11 and 12. For the beta binomial model, the probability of only observing  $A_x$  at site  $i$   
855 is given by

$$P(A_x | N_b) = L(N_b)_{i,j}^{\text{lost}} + L(N_b)_{i,j}^{\text{missed}} \quad (21)$$

856  
857  
858 where  $L(N_b)_{i,j}^{\text{lost}}$  and  $L(N_b)_{i,j}^{\text{missed}}$  are defined as in equations 18 and 19 respectively, but with  
859  $p_{i,j_d}$  replaced by  $1 - p_{i,j_d}$ . This is simply the probability of not observing the other allele in the  
860 recipient.

861  
862 Again, the probability of observing both alleles is

863



$$P(A_1, A_2 | N_b) = 1 - (P(A_1) + P(A_2))$$

864 (22)

865 where  $P(A_1)$  and  $P(A_2)$  are defined as in equation 21.

866

867 *Fitting mutation rate and  $N_e$*

868 The diffusion approximation to the Wright - Fischer model allows us to make predictions on the

869 allele frequency spectrum of a population given a mutation rate and an effective population size.

870 The probability of observing a mutation at frequency  $p_t$  given an initial frequency of 0 can be

871 approximated as in (Rouzine et al. 2001)

872

$$P(0, p_t, t, | \mu, N_e) = \frac{2\mu N_e}{p_t} e^{-\frac{2N_e p_t}{t}}$$

873 (23)

874 Where  $\mu$  is the mutation rate. In this model mutation increases an allele's frequency from 0 but

875 after that initial jump, drift is responsible for allowing the mutation to reach it's observed

876 frequency. Because the limit of equation 23 approaches infinity as  $p_t$  approaches 0 and for ease

877 in numerical integration, we assumed that any variant present at less than 0.1% was essentially

878 at 0%.

879

880 We then assumed each infection began as a clonal infection matching the consensus sequence

881 observed at the time of sampling. The likelihood of observing minor alleles at the observed

882 frequency is the given by equation 23.

883

884 As in the other within host models, we can account for nonpolymorphic sites by adding the

885 likelihood that no mutation is present  $P(0, p_t \approx 0, t | p_t < 0.001, \mu, N_e)$ , that a mutation is present

886 but below our level of detection  $P(0, p_t \approx 0, t | p_t < 0.02, \mu, N_e)$ , and that a mutation is present

887 but missed due to low sensitivity at low frequencies  $P(0, p_t \approx 0, t \mid 0.02 < p_t < 0.1, \mu, N_e)$ . In this  
 888 model we assumed 13133 mutagenic targets in each sample (the number of coding sites  
 889 present in the reference strain from 2014-2015).

890

891 The probability of not observing a mutation is given by

892

$$\begin{aligned}
 893 \quad P(0, p_t \approx 0, t, \mid \mu, N_e) &= P(0, p_t \approx 0, t \mid p_t < 0.001, \mu, N_e) + \\
 894 \quad &P(0, p_t \approx 0, t \mid p_t < 0.02, \mu, N_e) + \\
 895 \quad &P(0, p_t \approx 0, t \mid 0.02 < p_t < 0.1, \mu, N_e)
 \end{aligned}
 \tag{24}$$

896 Where

$$P(0, p_t \approx 0, t \mid p_t < 0.001, \mu, N_e) = 1 - \int_{0.001}^1 P(0, p_t, t, \mid \mu, N_e) dp_t$$

897 (25)

898 and

$$P(0, p_t \approx 0, t \mid p_t < 0.02, \mu, N_e) = \int_{0.001}^{0.02} P(0, p_t, t, \mid \mu, N_e) dp_t$$

899 (26)

900 and

$$P(0, p_t \approx 0, t \mid 0.02 < p_t < 0.1, \mu, N_e) = \sum_{f_i}^{[0.02, 0.05, 0.10]} (\text{FNR} \mid \text{Titer}_r, f_i) \int_{f_i}^{f_{i+1}} P(p_0, p_t, t \mid \mu, N_e) dp_t$$

901 (27)

902

903 Where we follow the same convention as in equation 5 for determining the false negative rate.  
 904 The log likelihood of a given  $\mu$  and  $N_e$  pair is then the sum of the log of equations 23 and 24 for  
 905 all possible sites in the data set.

906

907 Annotated computer code for all analyses and for generating the figures can be accessed at  
908 [https://github.com/lauringlab/Host\\_level\\_IAV\\_evolution](https://github.com/lauringlab/Host_level_IAV_evolution)

909

## 910 **Acknowledgments**

911 This work was supported by a Clinician Scientist Development Award from the Doris Duke  
912 Charitable Foundation (CSDA 2013105), a University of Michigan Discovery Grant, and R01  
913 AI118886, all to ASL. The HIVE cohort was supported by NIH R01 AI097150 and CDC U01  
914 IP00474 to ASM. JTM was supported by the Michigan Predoctoral Training Program in Genetics  
915 (T32GM007544). RJW was supported by K08AI119182. We thank Alexey Kondrashov and  
916 Aaron King for helpful discussion.

917

## 918 **References**

- 919 Alizon, S., Luciani, F. & Regoes, R.R., 2011. Epidemiological and clinical consequences of  
920 within-host evolution. *Trends in microbiology*, 19(1), pp.24–32.
- 921 ARCHETTI, I. & HORSFALL, F.L., 1950. Persistent antigenic variation of influenza A viruses  
922 after incomplete neutralization in ovo with heterologous immune serum. *The Journal of*  
923 *experimental medicine*, 92(5), pp.441–462.
- 924 Caton, A.J. et al., 1982. The antigenic structure of the influenza virus A/PR/8/34 hemagglutinin  
925 (H1 subtype). *Cell*, 31(2 Pt 1), pp.417–427.
- 926 Debbink, K. et al., 2017. Vaccination has minimal impact on the intrahost diversity of H3N2  
927 influenza viruses. *PLoS pathogens*, 13(1), p.e1006194.
- 928 Dinis, J.M. et al., 2016. Deep Sequencing Reveals Potential Antigenic Variants at Low  
929 Frequencies in Influenza A Virus-Infected Humans S. Schultz-Cherry, ed. *Journal of*  
930 *Virology*, 90(7), pp.3355–3365.
- 931 Doud, M.B., Hensley, S.E. & Bloom, J.D., 2017. Complete mapping of viral escape from  
932 neutralizing antibodies A. S. Luring, ed. *PLoS pathogens*, 13(3), pp.e1006271–20.
- 933 Ewens, W.J., 2004. *Mathematical Population Genetics 1*, Springer Science & Business Media.
- 934 Flannery, B. et al., 2016. Enhanced Genetic Characterization of Influenza A(H3N2) Viruses and  
935 Vaccine Effectiveness by Genetic Group, 2014-2015. *The Journal of Infectious Diseases*,  
936 214(7), pp.1010–1019.

- 937 Foll, M. et al., 2014. Influenza virus drug resistance: a time-sampled population genetics  
938 perspective. *PLoS genetics*, 10(2), p.e1004185.
- 939 Foll, M., Shim, H. & Jensen, J.D., 2015. WFABC: a Wright-Fisher ABC-based approach for  
940 inferring effective population sizes and selection coefficients from time-sampled data.  
941 *Molecular ecology resources*, 15(1), pp.87–98.
- 942 Geoghegan, J.L., Senior, A.M. & Holmes, E.C., 2016. Pathogen population bottlenecks and  
943 adaptive landscapes: overcoming the barriers to disease emergence. *Proceedings.*  
944 *Biological sciences / The Royal Society*, 283(1837), pp.20160727–9.
- 945 Gerstung, M. et al., 2012. Reliable detection of subclonal single-nucleotide variants in tumour  
946 cell populations. *Nature Communications*, 3, p.811.
- 947 Ghedin, E. et al., 2011. Deep sequencing reveals mixed infection with 2009 pandemic influenza  
948 A (H1N1) virus strains and the emergence of oseltamivir resistance. *The Journal of*  
949 *Infectious Diseases*, 203(2), pp.168–174.
- 950 Gubareva, L.V. et al., 2001. Selection of influenza virus mutants in experimentally infected  
951 volunteers treated with oseltamivir. *The Journal of Infectious Diseases*, 183(4), pp.523–531.
- 952 Herfst, S. et al., 2012. Airborne transmission of influenza A/H5N1 virus between ferrets. *Science*  
953 *(New York, NY)*, 336(6088), pp.1534–1541.
- 954 Holmes, E.C., 2009. RNA virus genomics: a world of possibilities. *The Journal of clinical*  
955 *investigation*, 119(9), pp.2488–2495.
- 956 Hughes, J. et al., 2012. Transmission of equine influenza virus during an outbreak is  
957 characterized by frequent mixed infections and loose transmission bottlenecks. *PLoS*  
958 *pathogens*, 8(12), p.e1003081.
- 959 Iqbal, M. et al., 2009. Within-host variation of avian influenza viruses. *Philosophical transactions*  
960 *of the Royal Society of London Series B, Biological sciences*, 364(1530), pp.2739–2747.
- 961 Kao, R.R. et al., 2014. Supersize me: how whole-genomesequencing and big data  
962 are transforming epidemiology. *Trends in microbiology*, pp.1–10.
- 963 Kimura, M., 1955. SOLUTION OF A PROCESS OF RANDOM GENETIC DRIFT WITH A  
964 CONTINUOUS MODEL. *Proceedings of the National Academy of Sciences of the United*  
965 *States of America*, 41(3), pp.144–150.
- 966 Kimura, M., 1971. Theoretical foundation of population genetics at the molecular level.  
967 *Theoretical population biology*, 2(2), pp.174–208.
- 968 Kimura, M. & Ohta, T., 1969. The Average Number of Generations until Fixation of a Mutant  
969 Gene in a Finite Population. *Genetics*, 61(3), pp.763–771.
- 970 Koel, B.F. et al., 2013. Substitutions near the receptor binding site determine major antigenic  
971 change during influenza virus evolution. *Science (New York, NY)*, 342(6161), pp.976–979.
- 972 Kouyos, R.D., Althaus, C.L. & Bonhoeffer, S., 2006. Stochastic or deterministic: what is the

- 973 effective population size of HIV-1? *Trends in microbiology*, 14(12), pp.507–511.
- 974 Kugelman, J.R. et al., 2017. Error baseline rates of five sample preparation methods used to  
975 characterize RNA virus populations K. K. Tee, ed., 12(2), pp.e0171333–13. Available at:  
976 <http://dx.plos.org/10.1371/journal.pone.0171333>.
- 977 Lee, M.-S. & Chen, J.S.-E., 2004. Predicting antigenic variants of influenza A/H3N2 viruses.  
978 *Emerging infectious diseases*, 10(8), pp.1385–1390.
- 979 McCrone, J.T. & Luring, A.S., 2016. Measurements of Intra-host Viral Diversity Are Extremely  
980 Sensitive to Systematic Errors in Variant Calling. *Journal of Virology*, 90(15), pp.6884–6895.
- 981 Monto, A.S. et al., 2014. Frequency of acute respiratory illnesses and circulation of respiratory  
982 viruses in households with children over 3 surveillance seasons. *The Journal of Infectious  
983 Diseases*, 210(11), pp.1792–1799.
- 984 Murcia, P.R. et al., 2010. Intra- and interhost evolutionary dynamics of equine influenza virus.  
985 *Journal of Virology*, 84(14), pp.6943–6954.
- 986 Myers, S., Fefferman, C. & Patterson, N., 2008. Can one learn history from the allelic spectrum?  
987 *Theoretical population biology*, 73(3), pp.342–348.
- 988 Neher, R.A. & Bedford, T., 2015. nextflu: real-time tracking of seasonal influenza virus evolution  
989 in humans. *Bioinformatics (Oxford, England)*, p.btv381.
- 990 Nelson, M.I. & Holmes, E.C., 2007. The evolution of epidemic influenza. *Nature Reviews  
991 Genetics*, 8(3), pp.196–205.
- 992 Nelson, M.I. et al., 2006. Stochastic processes are key determinants of short-term evolution in  
993 influenza A virus. *PLoS pathogens*, 2(12), p.e125.
- 994 Ohmit, S.E. et al., 2015. Influenza vaccine effectiveness in households with children during the  
995 2012-2013 season: assessments of prior vaccination and serologic susceptibility. *The  
996 Journal of Infectious Diseases*, 211(10), pp.1519–1528.
- 997 Ohmit, S.E. et al., 2013. Influenza Vaccine Effectiveness in the Community and the Household.  
998 *Clinical infectious diseases : an official publication of the Infectious Diseases Society of  
999 America*, 56(10), pp.1363–1369.
- 1000 Ohmit, S.E. et al., 2016. Substantial Influenza Vaccine Effectiveness in Households With  
1001 Children During the 2013-2014 Influenza Season, When 2009 Pandemic Influenza A(H1N1)  
1002 Virus Predominated. *The Journal of Infectious Diseases*, 213(8), pp.1229–1236.
- 1003 Pauly, M.D., Procaro, M.C. & Luring, A.S., 2017. A novel twelve class fluctuation test reveals  
1004 higher than expected mutation rates for influenza A viruses. *eLife*, 6, p.e26437.
- 1005 Peck, K.M., Chan, C.H.S. & Tanaka, M.M., 2015. Connecting within-host dynamics to the rate of  
1006 viral molecular evolution. *Virus Evolution*, 1(1), p.vev013.
- 1007 Petrie, J.G. et al., 2017. Application of an Individual-Based Transmission Hazard Model for  
1008 Estimation of Influenza Vaccine Effectiveness in a Household Cohort. *American journal of*

- 1009        *epidemiology*.
- 1010        Petrie, J.G. et al., 2013. Influenza Transmission in a Cohort of Households with Children: 2010-  
1011        2011 J. McVernon, ed. *PLoS ONE*, 8(9), p.e75339.
- 1012        Petrova, V.N. & Russell, C.A., 2017. The evolution of seasonal influenza viruses. *Nature*  
1013        *Reviews Microbiology*, 2, p.517.
- 1014        Poon, L.L.M. et al., 2016. Quantifying influenza virus diversity and transmission in humans.  
1015        *Nature Genetics*, 48(2), pp.195–200.
- 1016        Rambaut, A. et al., 2008. The genomic and epidemiological dynamics of human influenza A  
1017        virus. *Nature*, 453(7195), pp.615–619.
- 1018        Rogers, M.B. et al., 2015. Intrahost dynamics of antiviral resistance in influenza A virus reflect  
1019        complex patterns of segment linkage, reassortment, and natural selection. *mBio*, 6(2).
- 1020        Rouzine, I.M., Rodrigo, A. & Coffin, J.M., 2001. Transition between stochastic evolution and  
1021        deterministic evolution in the presence of selection: general theory and application to  
1022        virology. *Microbiology and molecular biology reviews : MMBR*, 65(1), pp.151–185.
- 1023        Russell, C.A. et al., 2012. The potential for respiratory droplet-transmissible A/H5N1 influenza  
1024        virus to evolve in a mammalian host. *Science (New York, NY)*, 336(6088), pp.1541–1547.
- 1025        Sanjuán, R. et al., 2010. Viral mutation rates. *Journal of Virology*, 84(19), pp.9733–9748.
- 1026        Smith, D.J. et al., 2004. Mapping the antigenic and genetic evolution of influenza virus. *Science*  
1027        *(New York, NY)*, 305(5682), pp.371–376.
- 1028        Sobel Leonard, A. et al., 2016. Deep Sequencing of Influenza A Virus from a Human Challenge  
1029        Study Reveals a Selective Bottleneck and Only Limited Intrahost Genetic Diversification D.  
1030        S. Lyles, ed. *Journal of Virology*, 90(24), pp.11247–11258.
- 1031        Sobel Leonard, A. et al., 2017. Transmission Bottleneck Size Estimation from Pathogen Deep-  
1032        Sequencing Data, with an Application to Human Influenza A Virus. *Journal of Virology*,  
1033        91(14).
- 1034        Varble, A. et al., 2014. Influenza A virus transmission bottlenecks are defined by infection route  
1035        and recipient host. *Cell Host and Microbe*, 16(5), pp.691–700.
- 1036        Visher, E. et al., 2016. The Mutational Robustness of Influenza A Virus N. M. Ferguson, ed.  
1037        *PLoS pathogens*, 12(8), pp.e1005856–25.
- 1038        Wiley, D.C., Wilson, I.A. & Skehel, J.J., 1981. Structural identification of the antibody-binding  
1039        sites of Hong Kong influenza haemagglutinin and their involvement in antigenic variation.  
1040        *Nature*, 289(5796), pp.373–378.
- 1041        Wilker, P.R. et al., 2013. Selection on haemagglutinin imposes a bottleneck during mammalian  
1042        transmission of reassortant H5N1 influenza viruses. *Nature Communications*, 4, p.2636.
- 1043        Williamson, E.G. & Slatkin, M., 1999. Using maximum likelihood to estimate population size  
1044        from temporal changes in allele frequencies. *Genetics*, 152(2), pp.755–761.

- 1045 Xu, R. et al., 2010. Structural basis of preexisting immunity to the 2009 H1N1 pandemic  
1046 influenza virus. *Science (New York, NY)*, 328(5976), pp.357–360.
- 1047 Xue, K.S. et al., 2017. Parallel evolution of influenza across multiple spatiotemporal scales.  
1048 *eLife*, 6, p.e26875.
- 1049 Zanini, F. et al., 2017. In vivo mutation rates and the landscape of fitness costs of HIV-1. *Virus*  
1050 *Evolution*, 3(1), p.vex003.
- 1051 Zhou, B. et al., 2009. Single-reaction genomic amplification accelerates sequencing and vaccine  
1052 production for classical and Swine origin human influenza A viruses. *Journal of Virology*,  
1053 83(19), pp.10309–10313.
- 1054 Zwart, M.P. & Elena, S.F., 2015. Matters of Size: Genetic Bottlenecks in Virus Infection and  
1055 Their Potential Impact on Evolution. *Annual Review of Virology*, 2(1), pp.161–179.
- 1056
- 1057



1058 **Figure Legends**

1059 **Figure 1.** Within host diversity of IAV populations. (A) Boxplots (median, 25<sup>th</sup> and 75<sup>th</sup>  
1060 percentiles, whiskers extend to most extreme point within median  $\pm$  1.5 x IQR) of the number of  
1061 viral genomes per microliter transport media stratified by day post symptom onset. Notches  
1062 represent the approximate 95% confidence interval of the median. (B) Boxplots (median, 25<sup>th</sup>  
1063 and 75<sup>th</sup> percentiles, whiskers extend to most extreme point within median  $\pm$  1.5 x IQR) of the  
1064 number of iSNV in 249 high quality samples stratified by day post symptom onset. (C)  
1065 Histogram of within host iSNV frequency in 249 high quality samples. Bin width is 0.05  
1066 beginning at 0.02. Mutations are colored nonsynonymous (blue) and synonymous (gold) (D)  
1067 Location of all identified iSNV in the influenza A genome. Mutations are colored  
1068 nonsynonymous (blue) and synonymous (gold) relative to that sample's consensus sequence.  
1069 Triangles signify mutations that were found in more than one individual in a given season.

1070  
1071 **Figure 2.** Within host dynamics of IAV. (A) Timing of sample collection for 35 paired longitudinal  
1072 samples relative to day of symptom onset. Of the 49 total, 35 pairs had minor iSNV present in  
1073 the first sample. (B) The change in frequency over time for minority nonsynonymous (blue) and  
1074 synonymous (gold) iSNV identified for the paired samples in (A). (C) The distribution of effective  
1075 population sizes estimated from 1,000 simulated populations. Simulations were run on  
1076 populations with characteristics similar to the actual patient-derived populations and with the  
1077 specified effective population size (x-axis). (D) The effect of iteratively removing iSNV with the  
1078 most extreme change in frequency (fraction of iSNV removed, x-axis) on the estimated effective  
1079 population size. The point represents the estimate when all iSNV are included. (E) The posterior  
1080 distributions of selection coefficients estimated for the 35 iSNV present in isolates sampled one  
1081 day apart. Distributions are colored according to class relative to the sample consensus  
1082 sequence, nonsynonymous (blue) synonymous (gold). Variants for which the 95% highest



1083 posterior density intervals exclude 0.0 are noted in the margin.

1084

1085 **Figure 3.** Between host dynamics of IAV. (A) The distribution of pairwise L1-norm distances for  
1086 household (blue) and randomly-assigned community (gold) pairs. The bar heights are  
1087 normalized to the height of the highest bar for each given subset (47 for household, 1,592 for  
1088 community). The red line represents the 5<sup>th</sup> percentile of the community distribution. (B) Timing  
1089 of symptom onset for 52 epidemiologically linked transmission pairs. Day of symptom onset for  
1090 both donor and recipient individuals is indicated by black dots. Dashed lines represent pairs that  
1091 were removed due to abnormally high genetic distance between isolates, see (A). (C) The  
1092 frequency of donor iSNV in both donor and recipient samples. Frequencies below 2% and  
1093 above 98% were set to 0% and 100% respectively. (D) The presence-absence model fit  
1094 compared with the observed data. The x-axis represents the frequency of donor iSNV with  
1095 transmitted iSNV plotted along the top and nontransmitted iSNV plotted along the bottom. The  
1096 black line indicates the probability of transmission for a given iSNV frequency as determined by  
1097 logistic regression. Similar fits were calculated for 1,000 simulations with a mean bottleneck size  
1098 of 1.66. Fifty percent of simulated outcomes lie in the darkly shaded region and 95% lie in the  
1099 lightly shaded regions. (E) The outcome from 1,000 simulated “transmission” events with  
1100 randomly assigned pairings. The black line represents the observed data, as in (D) the shaded  
1101 regions represent the middle 50% and 95% of simulated outcomes. The results from the  
1102 simulated logit models were smoothed by plotting the predicted probability of transmission at  
1103 0.02 intervals. (F) The beta-binomial model fit. Similar to (D) except the simulated outcomes are  
1104 the based on a beta-binomial model using a mean bottleneck of 1.73.

1105

1106 **Figure 4.** Combined estimates of within host mutation rate and effective population size.

1107 Contour plot shows the log likelihood surface for estimates of the effective population size and

1108 neutral mutation rate. The point represents the peak ( $\mu = 4 \times 10^{-6}$ ,  $N_e = 36$ , log likelihood = -  
1109 4,687 ). Log likelihoods for each contour are indicated.

1110

1111 **Supplementary Figure 1.** Sequence coverage for all samples. For each sample, the sliding  
1112 window mean coverage was calculated using a window size of 200 and a step of 100. The  
1113 distributions of these means are plotted as box plots (median, 25<sup>th</sup> and 75<sup>th</sup> percentiles,  
1114 whiskers extend to most extreme point within median  $\pm 1.5 \times$  IQR) where the y-axis represents  
1115 the read depth and the x-axis indicates the position of the window in a concatenated IAV  
1116 genome.

1117

1118 **Supplementary Figure 2.** Approximate maximum likelihood trees of the concatenated coding  
1119 sequences for high quality H1N1 samples. The branches are colored by season; the tip  
1120 identifiers are colored by household. Arrows with numbers indicate consensus and putative  
1121 minor haplotypes for samples with greater than 10 iSNV. Trees were made using FastTree.

1122

1123 **Supplementary Figure 3.** Approximate maximum likelihood trees of the concatenated coding  
1124 sequences for high quality H3N2 samples. The branches are colored by season; the tip  
1125 identifiers are colored by household. Arrows with numbers indicate consensus and putative  
1126 minor haplotypes for samples with greater than 10 iSNV. Trees were made using FastTree.

1127

1128 **Supplementary Figure 4.** The effect of titer and vaccination on the number of iSNV identified.  
1129 (A) The number of iSNV identified in an isolate (y-axis) plotted against the titer (x-axis,  
1130 genomes/ $\mu$ l transport media). (B) The number of iSNV identified in each isolate stratified by  
1131 whether that individual was vaccinated or not. Red bars indicate the median of each distribution.

1132

1133 **Supplementary Figure 5.** Minority nonsynonymous iSNV in global circulation.

1134 The global frequencies of the amino acids that were found as minority variants in sample  
1135 isolates (x-axis) plotted overtime (y-axis). Each amino acid trace is labeled according to the H3  
1136 number scheme. All samples were isolated in December of 2014 (gray line).

1137

1138 **Supplementary Figure 6.** Reproducibility of iSNV identification for paired samples acquired on  
1139 the same day. The x-axis represents iSNV frequencies found in the home-acquired nasal swab.  
1140 The y-axis represents iSNV frequencies found the clinic-acquired combined throat and nasal  
1141 swab.

1142

1143 **Supplementary Figure 7.** Estimate of effective bottleneck size with relaxed variant calling  
1144 criteria. (A) The frequency of iSNV in both recipient and donor isolates. iSNV were identified  
1145 using the original variant calling pipeline. (B) The presence-absence model fit compared to the  
1146 observed data for iSNV identified using the original variant calling pipeline. The x-axis  
1147 represents the frequency of donor iSNV with transmitted iSNV plotted along the top and  
1148 nontransmitted iSNV plotted along the bottom. The black line indicates the probability of  
1149 transmission for a given iSNV frequency as determined by logistic regression. Similar fits were  
1150 calculated for 1,000 simulations with a mean bottleneck size of 2.10. Fifty percent of simulated  
1151 outcomes lie in the darkly shaded region and 95% lie in the lightly shaded regions. (C) Similar to  
1152 (A) but with minority iSNV identified using the current analytical framework without a frequency  
1153 threshold. (D) Similar to B but with minority iSNV identified using the current analytical  
1154 framework without a frequency threshold.

1155

1156 **Table 1. Influenza viruses over five seasons in a household cohort**

|                                       | 2010-2011 | 2011-2012 | 2012-2013 | 2013-2014 | 2014-2015 |
|---------------------------------------|-----------|-----------|-----------|-----------|-----------|
| Households                            | 328       | 213       | 321       | 232       | 340       |
| Participants                          | 1441      | 943       | 1426      | 1049      | 1431      |
| Vaccinated, n (%) <sup>a</sup>        | 934 (65)  | 554 (59)  | 942 (66)  | 722 (69)  | 992 (69)  |
| IAV Positive Individuals <sup>b</sup> | 86        | 23        | 69        | 48        | 166       |
| H1N1                                  | 26        | 1         | 3         | 47        | 0         |
| H3N2                                  | 58        | 22        | 66        | 1         | 166       |
| IAV Positive Households <sup>c</sup>  |           |           |           |           |           |
| Two individuals                       | 13        | 2         | 9         | 7         | 23        |
| Three individuals                     | 5         | 2         | 3         | 3         | 11        |
| Four individuals                      | -         | -         | 1         | 2         | 4         |
| High Quality NGS Pairs <sup>d</sup>   | 4         | 1         | 2         | 6         | 39        |

1157  
1158  
1159  
1160  
1161  
1162  
1163  
1164

<sup>a</sup> Self reported or confirmed receipt of vaccine prior to the specified season.

<sup>b</sup> RT-PCR confirmed infection.

<sup>c</sup> Households in which two individuals were positive within 7 days of each other. In cases of trios and quartets, the putative chains could have no pair with onset >7 days apart.

<sup>d</sup> Samples with >10<sup>3</sup> genome copies per  $\mu$ l of transport medium, adequate amplification of all 8 genomic segments, and average sequencing coverage >10<sup>3</sup> per nucleotide.

1165 **Table 2. Within host effective population size of IAV**

| Model                   | SNV Used      | Generation Time (h) | Effective Population Size (95% CI) |
|-------------------------|---------------|---------------------|------------------------------------|
| Diffusion approximation | All           | 6                   | 35 (26-46)                         |
|                         | All           | 12                  | 17 (13-23)                         |
| Discrete model          | All           | 6                   | 32 (28-41)                         |
|                         | Nonsynonymous | 6                   | 30 (21-40)                         |
|                         | Synonymous    | 6                   | 37 (27-54)                         |
|                         | All           | 12                  | 23 (23-29)                         |
|                         | Nonsynonymous | 12                  | 19 (19-21)                         |
|                         | Synonymous    | 12                  | 27 (22-33)                         |

1166

1167

1168

1169 **Supplementary Table 1. Sensitivity and specificity of variant detection**

1170

| Copy Number <sup>a</sup>         | Variant Frequency | Original Pipeline <sup>b</sup> |             | Current Pipeline <sup>c</sup> |             |
|----------------------------------|-------------------|--------------------------------|-------------|-------------------------------|-------------|
|                                  |                   | Sensitivity                    | Specificity | Sensitivity                   | Specificity |
| >10 <sup>5</sup>                 | 0.05              | 1                              | >0.9999     | 0.85                          | 1.000       |
|                                  | 0.02              | 0.85                           | 0.9999      | 0.15                          | 1.000       |
|                                  | 0.01              | 0.95                           | 0.9995      | -                             | -           |
|                                  | 0.005             | 0.35                           | 0.9999      | -                             | -           |
| 10 <sup>4</sup> -10 <sup>5</sup> | 0.05              | 0.95                           | 0.9999      | 0.85                          | 1.000       |
|                                  | 0.02              | 0.9                            | 0.9999      | 0.15                          | 1.000       |
|                                  | 0.01              | 0.8                            | 0.9998      | -                             | -           |
|                                  | 0.005             | 0.4                            | 0.9999      | -                             | -           |
| 10 <sup>3</sup> -10 <sup>4</sup> | 0.05              | 0.8                            | >0.9999     | 0.70                          | 1.000       |
|                                  | 0.02              | 0.45                           | 0.9999      | 0.15                          | 1.000       |
|                                  | 0.01              | 0.2                            | 0.9997      | -                             | -           |
|                                  | 0.005             | 0.1                            | 0.9999      | -                             | -           |

1171

1172 <sup>a</sup> Per µl transport media

1173 <sup>b</sup> As described in McCrone JT and Lauring AS, J. Virol. 90(15):6884, 2016.

1174 <sup>c</sup> As described in Methods, benchmarked for frequencies 0.02-0.98 only

1175  
1176  
1177

**Supplementary Table 2. Nonsynonymous substitutions in HA antigenic sites**

| House ID | Enrolment ID | Symptom Onset | Subtype | Frequency | Amino Acid Change | Antigenic Site | Vaccinated | Day of Symptoms |
|----------|--------------|---------------|---------|-----------|-------------------|----------------|------------|-----------------|
| 1111     | 300481       | 3-30-2011     | H3N2    | 0.071     | E62G              | E*             | No         | 0               |
| 2166     | 320661       | 2-13-2012     | H3N2    | 0.071     | V297A             | C              | Yes        | 1               |
| 1302     | 301355       | 3-20-2011     | H3N2    | 0.088     | L86I              | E              | Yes        | 1               |
| 3075     | 331045       | 12-10-2012    | H3N2    | 0.066     | I214T             | D              | Yes        | 1               |
| 5219     | 50935        | 12-5-2014     | H3N2    | 0.175     | F193S             | B*†            | No         | 3               |
| 5263     | 51106        | 12-6-2014     | H3N2    | 0.111     | T128A             | B              | Yes        | 3               |
| 5290     | 51225        | 12-15-2014    | H3N2    | 0.405     | I260V             | E*             | Yes        | 1               |
| 5302     | 51273        | 12-13-2014    | H3N2    | 0.030     | S262N             | E*             | Yes        | 0               |
| 5098     | 50419        | 12-22-2014    | H3N2    | 0.364     | G208R             | D              | Yes        | 4               |
| 5033     | 50141        | 12-3-2014     | H3N2    | 0.032     | A163T             | B              | Yes        | 2               |
| 5034     | 50143        | 1-11-2015     | H3N2    | 0.119     | I307R             | C              | Yes        | 1               |
| 5289     | 51220        | 12-13-2014    | H3N2    | 0.038     | K189N             | B*†            | Yes        | -1              |
| 5033     | 50141        | 12-3-2014     | H3N2    | 0.025     | D53E              | C*             | Yes        | 1               |
| 5033     | 50141        | 12-3-2014     | H3N2    | 0.023     | S312G             | C              | Yes        | 1               |
| 5269     | 51132        | 12-6-2014     | H3N2    | 0.028     | I242T             | D              | Yes        | 2               |
| 5147     | 50630        | 11-18-2014    | H3N2    | 0.164     | I242L             | D              | Yes        | 1               |
| 5034     | 50143        | 1-11-2015     | H3N2    | 0.161     | I307R             | C              | Yes        | 2               |
| 4185     | UM40738      | 12-14-2013    | H1N1    | 0.021     | R208K             | Ca             | No         | 2               |

1178  
1179  
1180

\* Sites observed to vary between antigenically distinct strains in Wiley et al., 1981 and Smith DJ et al., 2004.

† Sites located in the “antigenic ridge” identified in Koel et al., 2013.

Figure 1

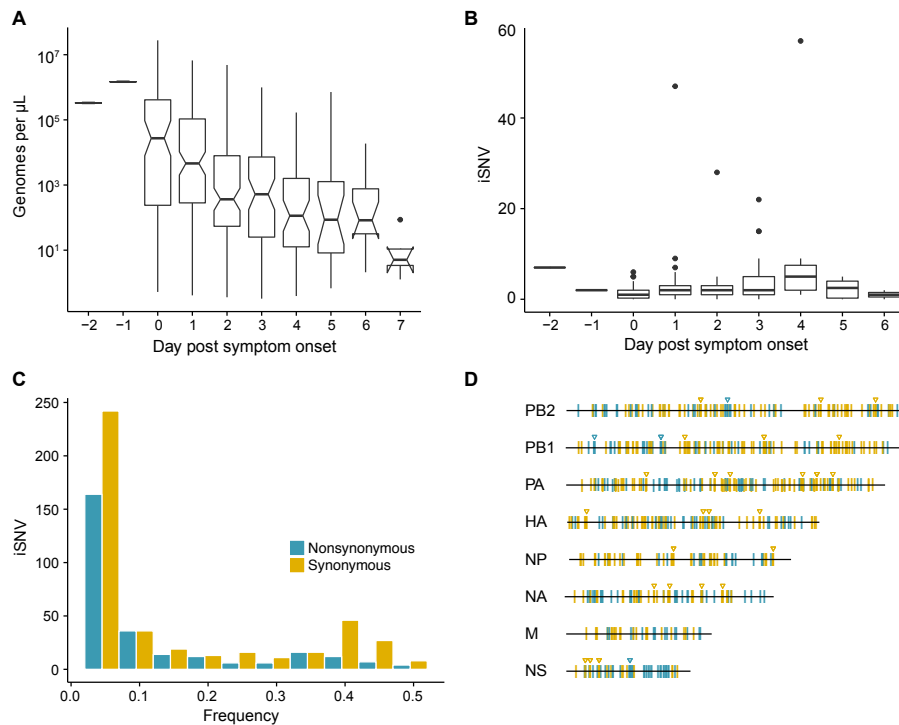

Figure 1. Within host diversity of IAV populations. (A) Boxplots (median, 25th and 75th percentiles, whiskers extend to most extreme point within median  $\pm$  1.5 x IQR) of the number of viral genomes per microliter transport media stratified by day post symptom onset. Notches represent the approximate 95% confidence interval of the median. (B) Boxplots (median, 25th and 75th percentiles, whiskers extend to most extreme point within median  $\pm$  1.5 x IQR) of the number of iSNV in 249 high quality samples stratified by day post symptom onset. (C) Histogram of within host iSNV frequency in 249 high quality samples. Bin width is 0.05 beginning at 0.02. Mutations are colored nonsynonymous (blue) and synonymous (gold) (D) Location of all identified iSNV in the influenza A genome. Mutations are colored nonsynonymous (blue) and synonymous (gold) relative to that sample's consensus sequence. Triangles signify mutations that were found in more than one individual in a given season.



Figure 2

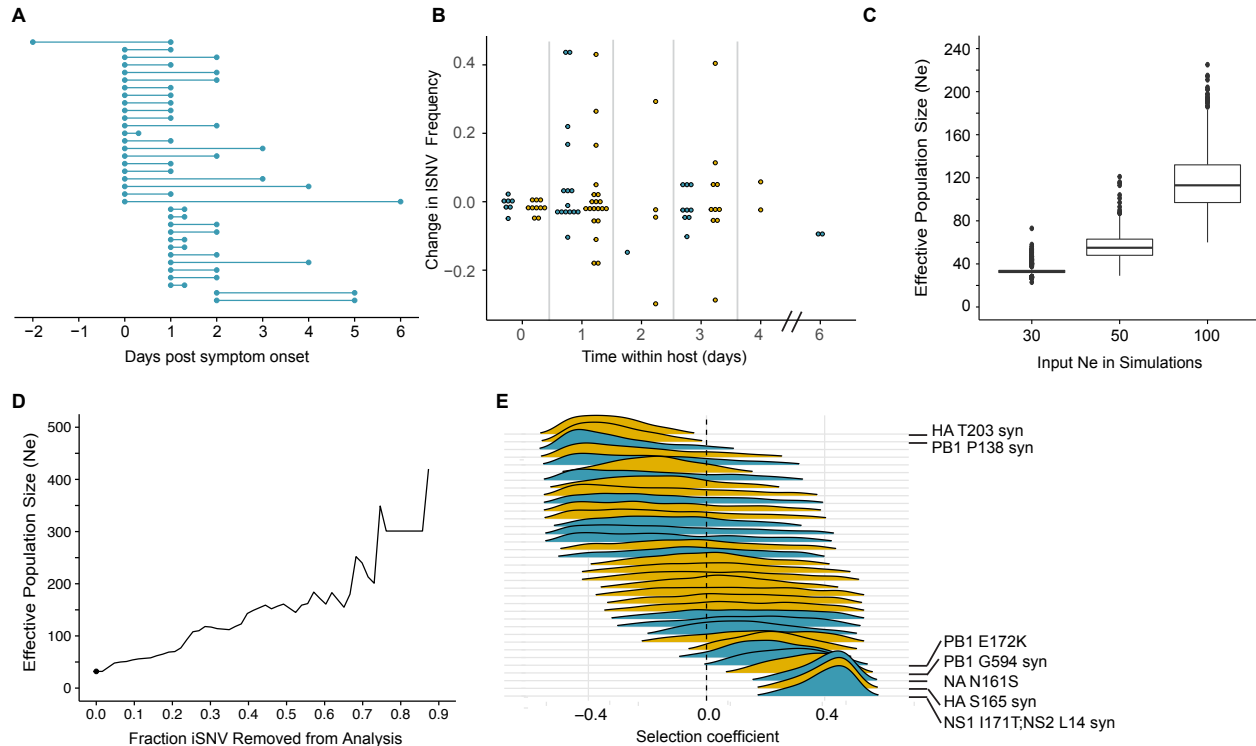

Figure 2. Within host dynamics of IAV. (A) Timing of sample collection for 35 paired longitudinal samples relative to day of symptom onset. Of the 49 total, 35 pairs had minor iSNV present in the first sample. (B) The change in frequency over time for minority nonsynonymous (blue) and synonymous (gold) iSNV identified for the paired samples in (A). (C) The distribution of effective population sizes estimated from 1,000 simulated populations. Simulations were run on populations with characteristics similar to the actual patient-derived populations and with the specified effective population size (x-axis). (D) The effect of iteratively removing iSNV with the most extreme change in frequency (fraction of iSNV removed, x-axis) on the estimated effective population size. The point represents the estimate when all iSNV are included. (E) The posterior distributions of selection coefficients estimated for the 35 iSNV present in isolates sampled one day apart. Distributions are colored according to class relative to the sample consensus sequence, nonsynonymous (blue) synonymous (gold). Variants for which the 95% highest posterior density intervals exclude 0.0 are noted in the margin.

Figure 3

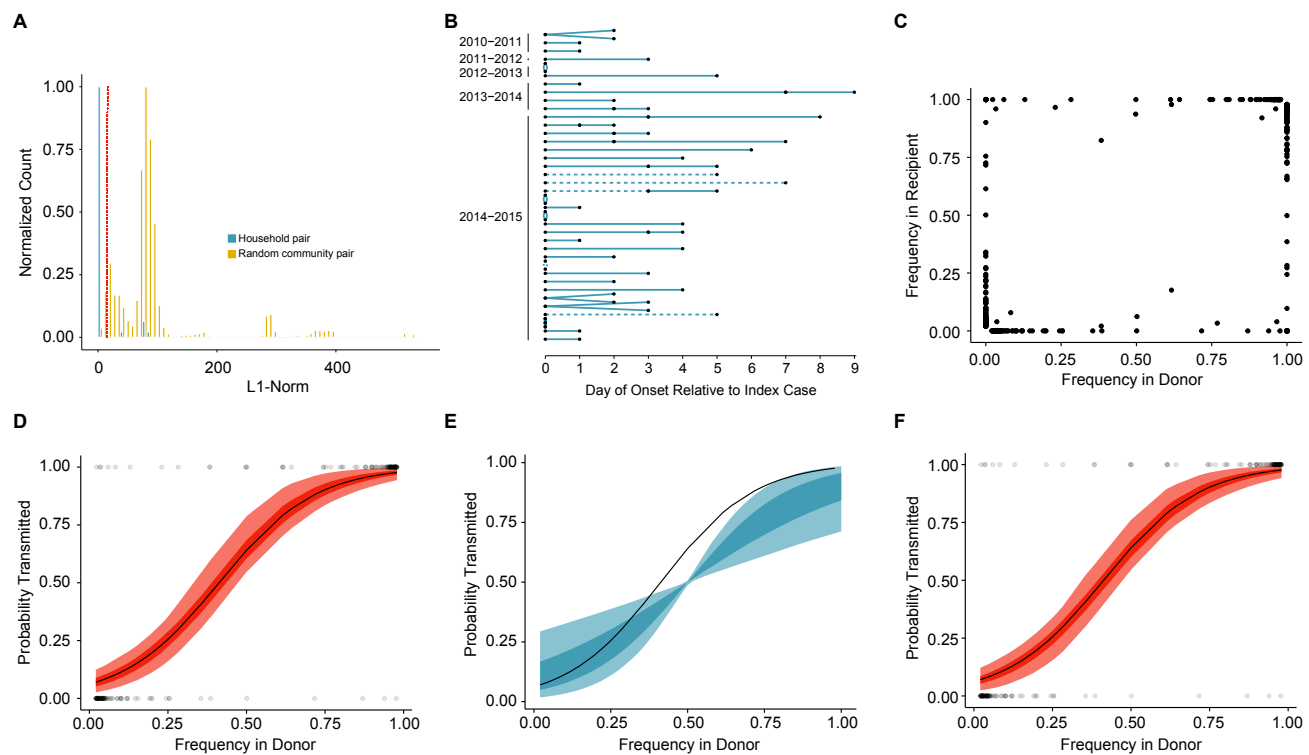

Figure 3. Between host dynamics of IAV. (A) The distribution of pairwise L1-norm distances for household (blue) and randomly-assigned community (gold) pairs. The bar heights are normalized to the height of the highest bar for each given subset (47 for household, 1,592 for community). The red line represents the 5th percentile of the community distribution. (B) Timing of symptom onset for 52 epidemiologically linked transmission pairs. Day of symptom onset for both donor and recipient individuals is indicated by black dots. Dashed lines represent pairs that were removed due to abnormally high genetic distance between isolates, see (A). (C) The frequency of donor iSNV in both donor and recipient samples. Frequencies below 2% and above 98% were set to 0% and 100% respectively. (D) The presence-absence model fit compared with the observed data. The x-axis represents the frequency of donor iSNV with transmitted iSNV plotted along the top and nontransmitted iSNV plotted along the bottom. The black line indicates the probability of transmission for a given iSNV frequency as determined by logistic regression. Similar fits were calculated for 1,000 simulations with a mean bottleneck size of 1.66. Fifty percent of simulated outcomes lie in the darkly shaded region and 95% lie in the lightly shaded regions. (E) The outcome from 1,000 simulated “transmission” events with randomly assigned pairings. The black line represents the observed data, as in (D) the shaded regions represent the middle 50% and 95% of simulated outcomes. The results from the simulated logit models were smoothed by plotting the predicted probability of transmission at 0.02 intervals. (F) The beta-binomial model fit. Similar to (D) except the simulated outcomes are the based on a beta-binomial model using a mean bottleneck of 1.73.

Figure 4

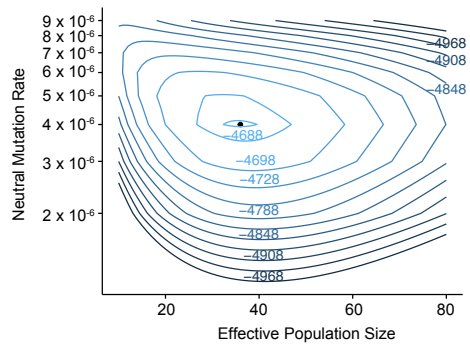

Figure 4. Combined estimates of within host mutation rate and effective population size. Contour plot shows the log likelihood surface for estimates of the effective population size and neutral mutation rate. The point represents the peak ( $\mu = 4 \times 10^{-6}$ ,  $N_e = 36$ , log likelihood = -4,687 ). Log likelihoods for each contour are indicated.

## Supplementary Figure 1

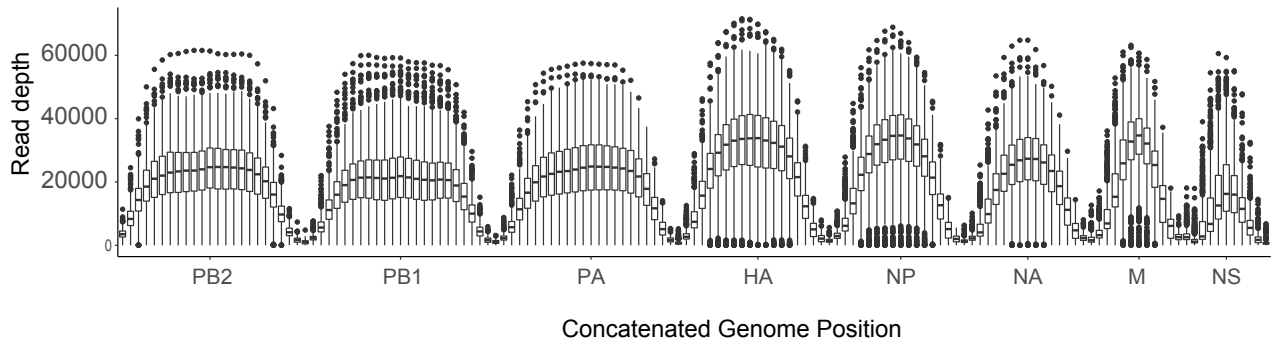

Supplementary Figure 1. Sequence coverage for all samples. For each sample, the sliding window mean coverage was calculated using a window size of 200 and a step of 100. The distributions of these means are plotted as box plots (median, 25th and 75th percentiles, whiskers extend to most extreme point within median  $\pm$  1.5 x IQR) where the y-axis represents the read depth and the x-axis indicates the position of the window in a concatenated IAV genome.

## Supplementary Figure 2

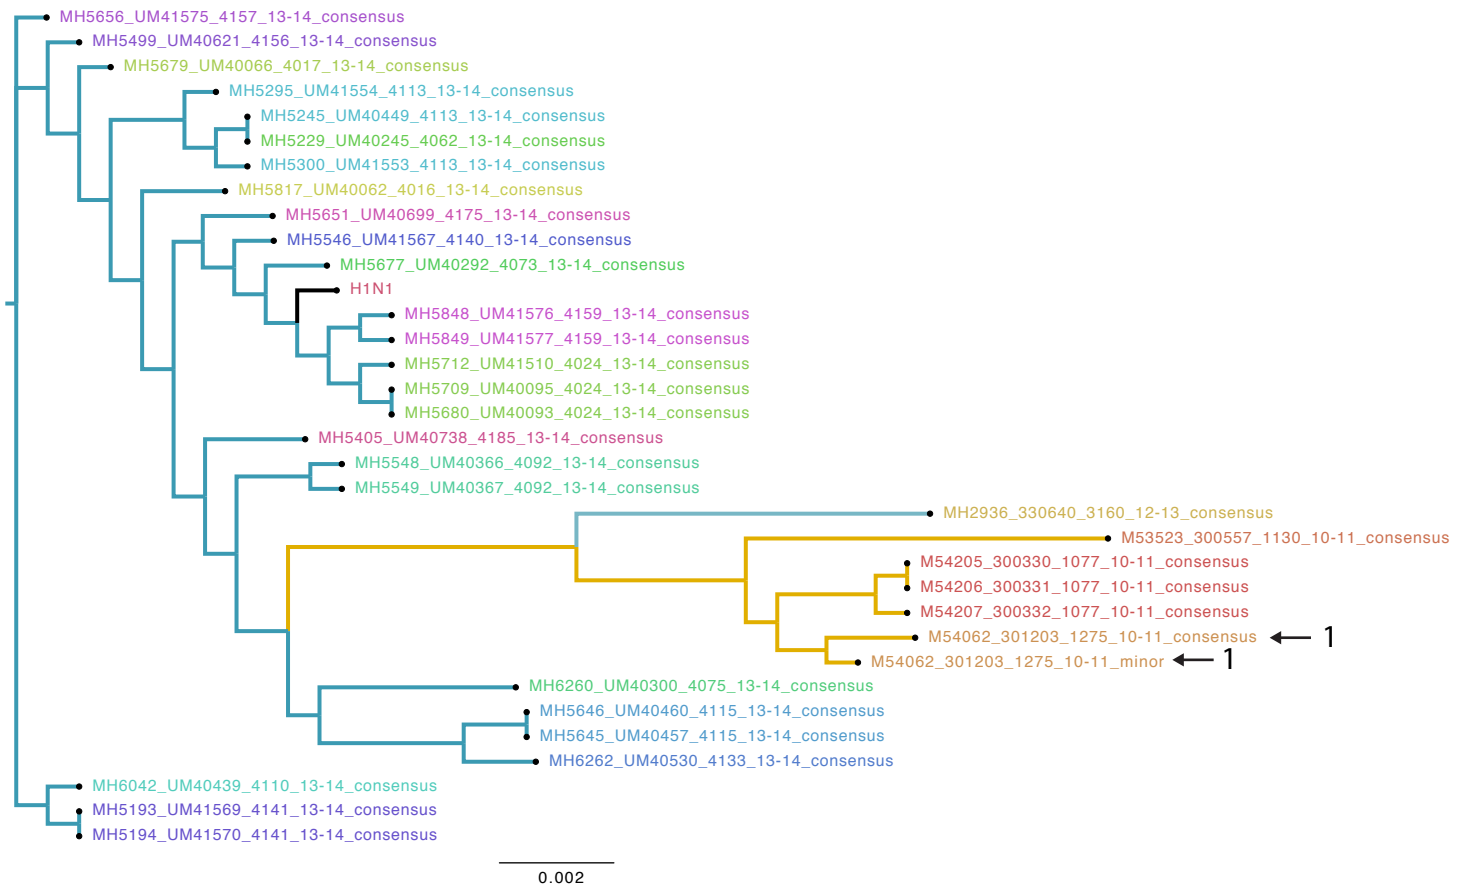

Supplementary Figure 2. Approximate maximum likelihood trees of the concatenated coding sequences for high quality H1N1 samples. The branches are colored by season; the tip identifiers are colored by household. Arrows with numbers indicate consensus and putative minor haplotypes for samples with greater than 10 iSNV. Trees were made using FastTree.

### Supplementary Figure 3

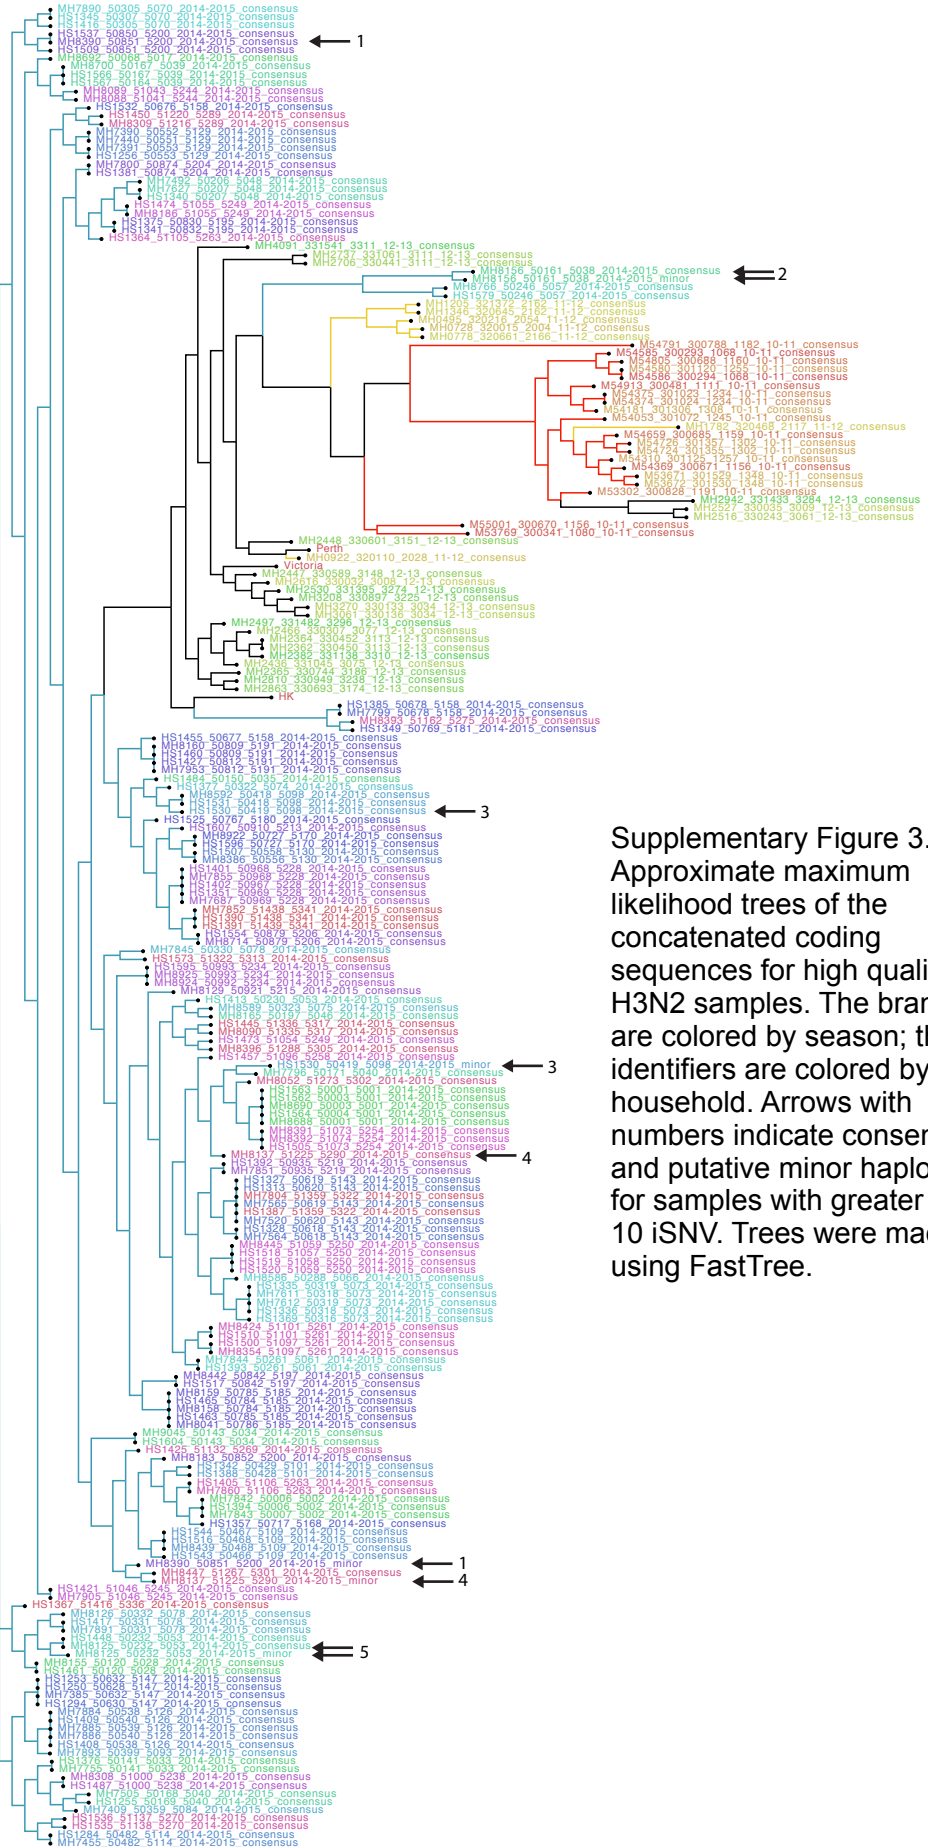

Supplementary Figure 3. Approximate maximum likelihood trees of the concatenated coding sequences for high quality H3N2 samples. The branches are colored by season; the tip identifiers are colored by household. Arrows with numbers indicate consensus and putative minor haplotypes for samples with greater than 10 iSNV. Trees were made using FastTree.

## Supplementary Figure 4

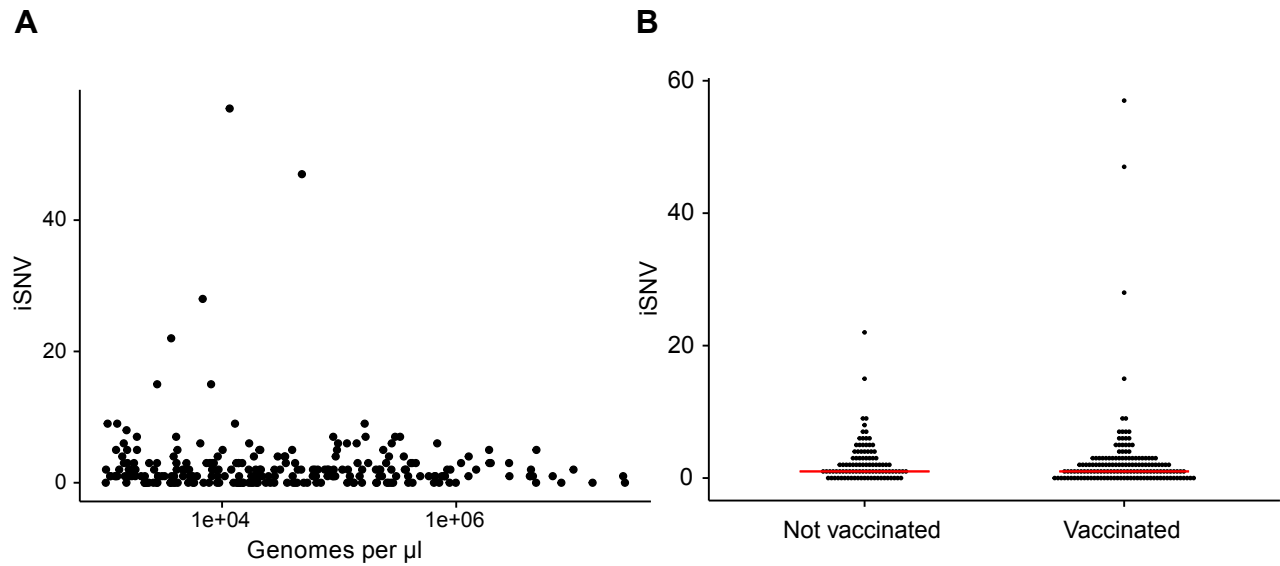

Supplementary Figure 4. The effect of titer and vaccination on the number of iSNV identified. (A) The number of iSNV identified in an isolate (y-axis) plotted against the titer (x-axis, genomes/ $\mu$ l transport media). (B) The number of iSNV identified in each isolate stratified by whether that individual was vaccinated or not. Red bars indicate the median of each distribution.

## Supplementary Figure 5

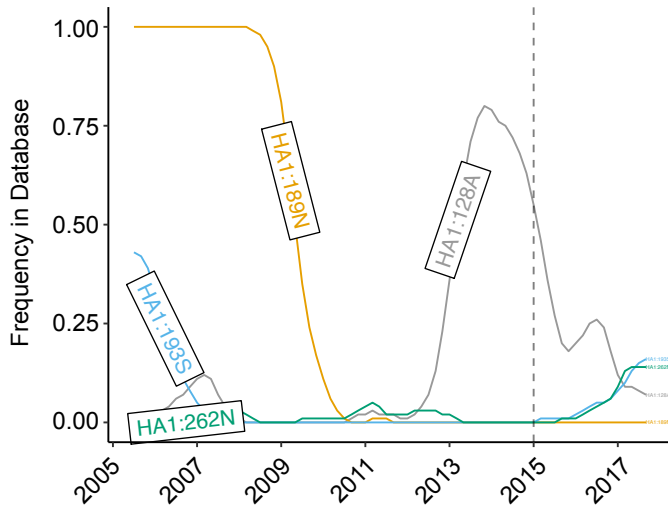

Supplementary Figure 5. Minority nonsynonymous iSNV in global circulation. The global frequencies of the amino acids that were found as minority variants in sample isolates (x-axis) plotted overtime (y-axis). Each amino acid trace is labeled according to the H3 number scheme. All samples were isolated in December of 2014 (gray line).



## Supplementary Figure 6

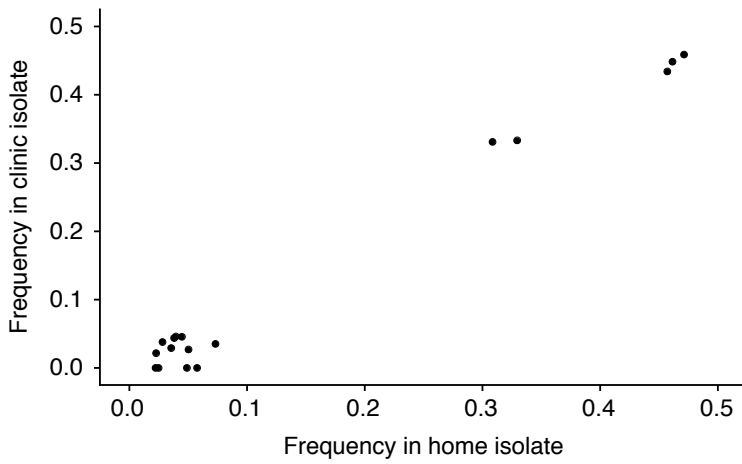

Supplementary Figure 6. Reproducibility of iSNV identification for paired samples acquired on the same day. The x-axis represents iSNV frequencies found in the home-acquired nasal swab. The y-axis represents iSNV frequencies found the clinic-acquired combined throat and nasal swab.

## Supplementary Figure 7

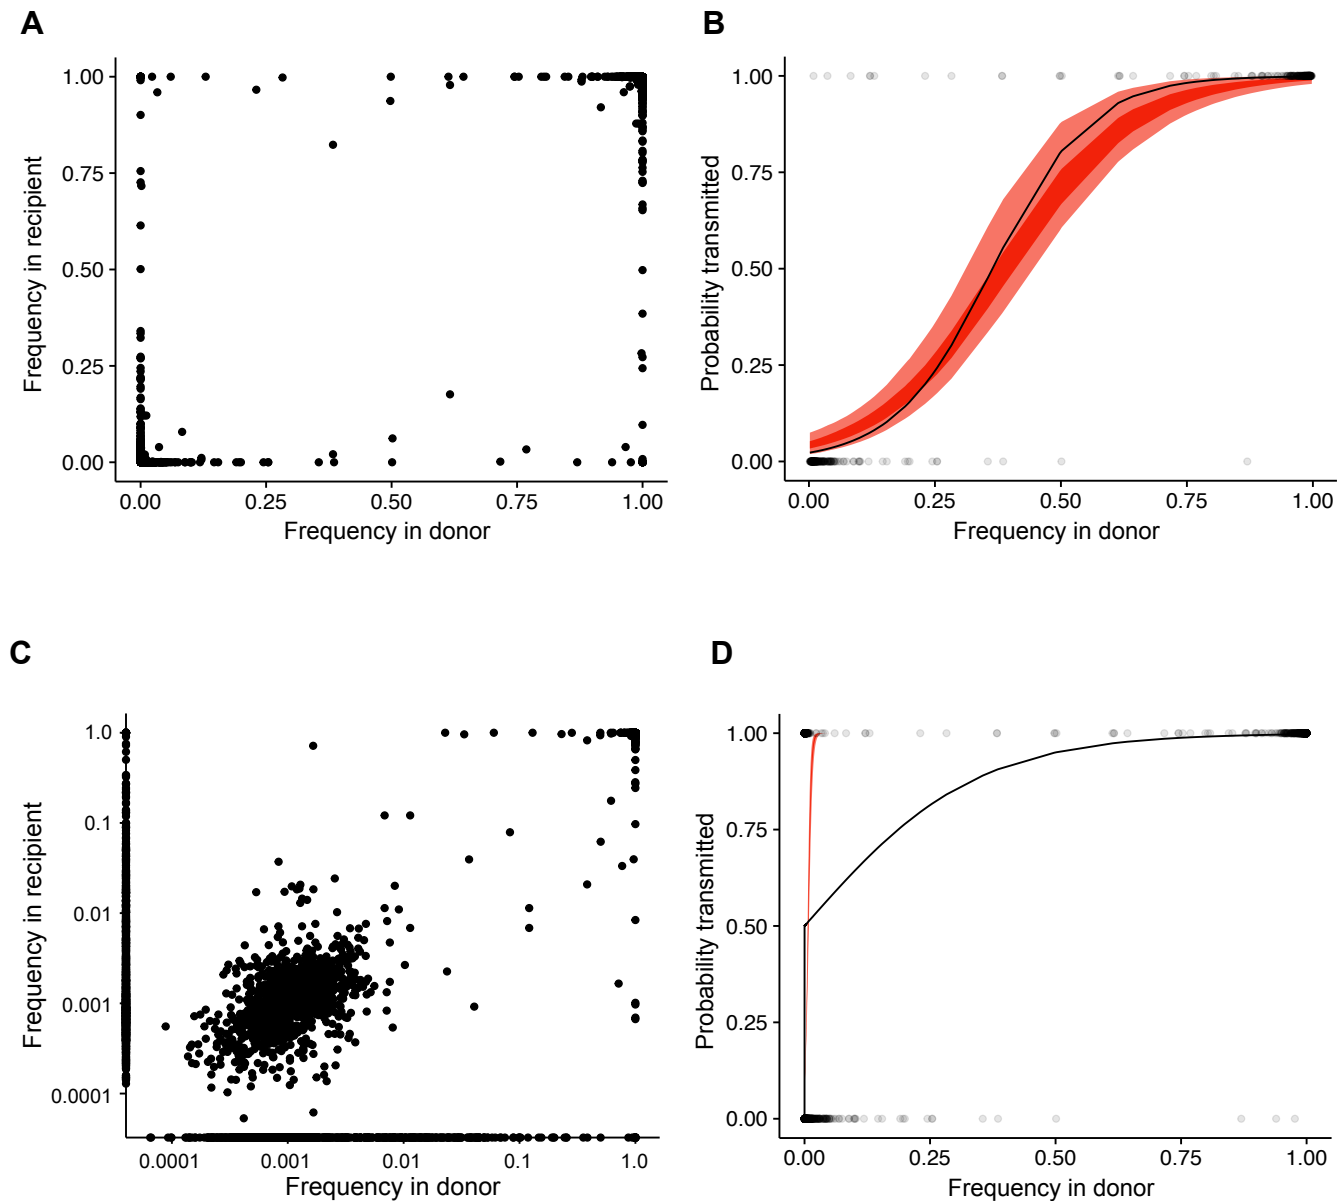

Supplementary Figure 7. Estimate of effective bottleneck size with relaxed variant calling criteria. (A) The frequency of iSNV in both recipient and donor isolates. iSNV were identified using the original variant calling pipeline. (B) The presence-absence model fit compared to the observed data for iSNV identified using the original variant calling pipeline. The x-axis represents the frequency of donor iSNV with transmitted iSNV plotted along the top and nontransmitted iSNV plotted along the bottom. The black line indicates the probability of transmission for a given iSNV frequency as determined by logistic regression. Similar fits were calculated for 1,000 simulations with a mean bottleneck size of 2.10. Fifty percent of simulated outcomes lie in the darkly shaded region and 95% lie in the lightly shaded regions. (C) Similar to (A) but with minority iSNV identified using the current analytical framework without a frequency threshold. (D) Similar to B but with minority iSNV identified using the current analytical framework without a frequency threshold.
